1 Sleep-like changes in neural processing emerge during sleep deprivation in  
2 early auditory cortex

3

4 Amit Marmelshtein<sup>1</sup>, Yuval Nir<sup>1,2,3,4</sup>

5 1. Sagol School of Neuroscience, Tel Aviv University, Tel Aviv 6997801, Israel

6 2. Department of Physiology and Pharmacology, Sackler Faculty of Medicine, Tel Aviv University, Tel Aviv 6997801,  
7 Israel

8 3. Department of Biomedical Engineering, Faculty of Engineering, Tel Aviv University, Tel Aviv 6997801, Israel

9 4. The Sieratzki-Sagol Center for Sleep Medicine, Tel Aviv Sourasky Medical Center, Tel Aviv, Israel.

10

11 Corresponding author: Yuval Nir, [ynir@tauex.tau.ac.il](mailto:ynir@tauex.tau.ac.il)

12

13 **Competing interests**

14 The authors declare that no financial and non-financial competing interests exist.

15

16 **Acknowledgements**

17 We thank Israel Nelken for input on auditory setup and analyses. Rafael Malach, Mark Shein-  
18 Idelson, Aaron Krom, Yael Oran and Yaniv Sela for comments on an earlier draft, and members  
19 of the Nir Lab for discussions.

20

21

22

23

24

25

26 **Abstract**

27

28 Insufficient sleep is commonplace in modern lifestyle and can lead to grave outcomes, yet the  
29 changes in neuronal activity accumulating over hours of extended wakefulness remain poorly  
30 understood. Specifically, which aspects of cortical processing are affected by sleep deprivation  
31 (SD), and whether they also affect early sensory regions, remains unclear. Here, we recorded  
32 spiking activity in rat auditory cortex along with polysomnography while presenting sounds  
33 during SD followed by recovery sleep. We found that frequency tuning, onset responses, and  
34 spontaneous firing rates were largely unaffected by SD. By contrast, SD decreased entrainment  
35 to rapid ( $\geq 20$  Hz) click-trains, increased population synchrony, and increased the prevalence of  
36 sleep-like stimulus-induced silent periods, even when ongoing activity was similar. Recovery  
37 NREM sleep was associated with similar effects as SD with even greater magnitude, while  
38 auditory processing during REM sleep was similar to vigilant wakefulness. Our results show that  
39 processes akin to those in NREM sleep invade the activity of cortical circuits during SD, already in  
40 early sensory cortex.

41

42 **Keywords**

43 NREM, REM, A1, frequency tuning, rat, click-trains, OFF periods, state-dependent, sensory

44

45

## 46 Introduction

47

48 Sleep deprivation (SD) is inherent to modern daily life and entails considerable social and health-related  
49 costs (Carskadon, 2004). During SD, homeostatic and circadian processes interact to build up sleep  
50 pressure (Borbély, 1982) that impairs cognitive performance (Doran et al., 2001), and can lead to serious  
51 consequences such as car accidents and medical errors (Carskadon, 2004). Cognitive functions particularly  
52 affected by SD include psychomotor and cognitive speed, vigilant and executive attention, working  
53 memory, emotional regulation, and higher cognitive abilities (Krause et al., 2017) associated with activity  
54 in attentional thalamic and fronto-parietal circuits (Chee et al., 2008; Drummond et al., 1999, 2005; Padilla  
55 et al., 2006; Portas et al., 1998; Thomas et al., 2000; Tomasi et al., 2009; Weissman et al., 2006; Wu et al.,  
56 2006).

57 Previous non-invasive studies examined the effect of insufficient sleep on neurophysiological activity  
58 (Basner et al., 2013; Chee, 2015; Finelli et al., 2000; Krause et al., 2017; Lorenzo et al., 1995), yet only few  
59 studies examined the effects of SD on spiking activities in local neuronal populations. In the rat frontal  
60 cortex, robust changes in spontaneous cortical activity gradually emerge during merely a few hours of SD  
61 (Vyazovskiy et al., 2011). One study examined the effects of extended wakefulness on sensory responses  
62 in high-order human temporal lobe neurons, reporting attenuated, prolonged and delayed responses  
63 associated with behavioral lapses (Nir et al., 2017). However, it remains largely unknown whether such  
64 effects are restricted to high-order multi-modal regions, or may also affect neuronal activities along  
65 specific sensory pathways. Studying the effects of SD on early sensory processing can help shed light on  
66 the fundamental processes by which the slow buildup of sleep pressure alters neural processing.

67 A parallel, equally important, motivation for studying the effects of SD on sensory processing is that it  
68 serves as a unique and powerful model for assessing the effects of brain state and arousal on sensory  
69 processing at the neuronal level (Harris and Thiele, 2011; Lee and Dan, 2012). A rich body of literature  
70 reports the effects of behavioral state and arousal on sensory processing, particularly in the auditory  
71 domain. Such studies typically employ one of the following three strategies; One approach is studying  
72 how sensory processing differs with respect to behavioral performance on specific tasks (Atiani et al.,  
73 2009, 2014; Jaramillo and Zador, 2011; Kato et al., 2015; Otazu et al., 2009). A second approach focuses  
74 on momentary changes in arousal, indexed by pupil size, EEG or locomotor activity during wakefulness  
75 (Bereshpolova et al., 2011; Lin et al., 2019; McGinley et al., 2015; Zhou et al., 2014; Zhuang et al., 2014).  
76 The third strategy contrasts sensory processing in wakefulness with those during anesthesia or natural

77 sleep (Bergman et al., 2022; Issa and Wang, 2011, 2013; Krom et al., 2020; Nir et al., 2013a; Nourski et al.,  
78 2018; Raz et al., 2014; Sela et al., 2020). In this context, SD affords an additional unique window to  
79 examine how brain states affect sensory processing by offering a ‘middle-tier’ alternative - a state where  
80 subjects are awake and responsive but already show behavioral deficits (Krause et al., 2017; Lim and  
81 Dinges, 2010). It remains unexplored whether slow accumulation of sleep pressure over hours of SD and  
82 extended wakefulness may cause state-dependent changes in sensory processing similar to those  
83 associated with momentary arousal changes, on one hand, and to what extent such changes are  
84 reminiscent of changes observed during actual sleep, on the other.

85 Here, we set out to address these issues and examine to what extent SD constitutes an intermediate state  
86 between vigilant wakefulness and sleep. We compared neuronal spiking activity in the auditory cortex of  
87 freely behaving rats in response to a wide array of sounds including click trains and tones (dynamic  
88 random chords (Linden, 2003)). We separately examined how SD affects different aspects of auditory  
89 processing including spontaneous activity, frequency tuning, population synchrony, onset vs. sustained  
90 responses, and entrainment to slow- vs. fast-varying inputs. Previous research established that some  
91 “motifs” of cortical auditory processing are relatively invariant to momentary changes in arousal (e.g.  
92 onset responses) whereas other motifs are sensitive to behavioral state (e.g. noise correlations, late  
93 sustained responses) (Pachitariu et al., 2015; Sela et al., 2020). Therefore, we hypothesized that  
94 cumulative changes over several hours of experimentally-induced SD will lead to changes in *specific*  
95 aspects of sensory-evoked activity and that such changes will be detected already in early auditory cortex  
96 (Atiani et al., 2009; Jaramillo and Zador, 2011; Otazu et al., 2009; Zhou et al., 2014). In line with this  
97 hypothesis, our results show that frequency tuning, onset responses, and spontaneous firing rates were  
98 unaffected by SD. By contrast, SD decreased neuronal entrainment to rapid ( $\geq 20$  Hz) click-trains, increased  
99 population synchrony, and increased the prevalence of sleep-like stimulus-induced silent intervals. The  
100 changes brought about by SD were qualitatively similar to those observed during recovery NREM sleep,  
101 but not during REM sleep where auditory processing was similar to vigilant wakefulness. Thus, our results  
102 show that processes akin to those in NREM sleep invade the activity of cortical circuits during SD, already  
103 in early sensory cortex.

104

105

## 106 **Results**

107 To study how sleep deprivation and sleep states affect sensory processing and compare auditory  
108 responses across Vigilant, Tired, and sleep conditions, adult male Wister rats ( $n=7$ ) were implanted with  
109 microwire arrays targeting the auditory cortex (AC), as well as EEG and EMG electrodes. After recovery  
110 and habituation, rats were placed inside a computer-controlled motorized running wheel within an  
111 acoustic chamber for 10 hours starting at light onset (Fig. 1A). We confirmed successful targeting of AC  
112 (either A1 or dorsal AC) with histology (Fig. 1B), and by examining the response latency of neuronal units  
113 to clicks. 84.9% of recorded units were auditory responsive, and 95.7% of these units (405/423) responded  
114 within  $<20\text{ms}$  (Fig. 1C) attesting to successful targeting of early AC.

115 Rats underwent 5h of sleep deprivation (SD) by intermittent rotations of the wheel (Christie et al., 2008)  
116 (3s bouts interleaved with 12-18s idle intervals, Fig. 1D gray). Then, they were left to sleep undisturbed  
117 for additional 5h as they spontaneously transitioned between NREM sleep, REM sleep, and short epochs  
118 of wakefulness (Fig. 1D, black). Throughout this time, we monitored behavior via synchronized video and  
119 intermittently presented auditory stimuli. We focused on comparing the first and last thirds ( $\sim 100\text{min}$   
120 each) of the 5h SD period, referred to throughout the manuscript as “Vigilant” and “Tired” conditions,  
121 respectively (Fig. 1D). We verified that intervals categorized as Tired were not significantly contaminated  
122 by sleep attempts using extensive inspection of video data, and examination of slow wave activity (SWA,  
123 1-4 Hz). Indeed, SWA during the Tired condition was much more similar to that observed in the Vigilant  
124 condition than to subsequent NREM sleep (mean $\pm$ SD:  $141\pm 48 \mu\text{V}^2/\text{Hz}$  in Vigilant and  $184\pm 62 \mu\text{V}^2/\text{Hz}$  in  
125 Tired, versus  $607\pm 218 \mu\text{V}^2/\text{Hz}$  in the first third of recovery NREM sleep).

126

### 127 **Frequency tuning, spontaneous firing rates, and onset responses are preserved across Vigilant and** 128 **Tired conditions during sleep deprivation**

129 Based on previous studies on state-dependent auditory processing (Introduction), we hypothesized that  
130 certain features of auditory cortical processing such as frequency tuning will be invariant to SD, whereas  
131 other features will be modulated by SD and more generally by arousal state. To test this, we first compared  
132 neuronal frequency tuning by examining the responses to dynamic random chord stimuli (Linden, 2003).  
133 Fig. 2A shows a representative spectro-temporal receptive field (STRF) of a neuronal cluster during Vigilant  
134 and Tired conditions. As can be seen, frequency tuning remains very stable throughout SD. Next, we  
135 quantified this stability across the entire dataset ( $n=198$  significantly tuned units out of 496 total) by

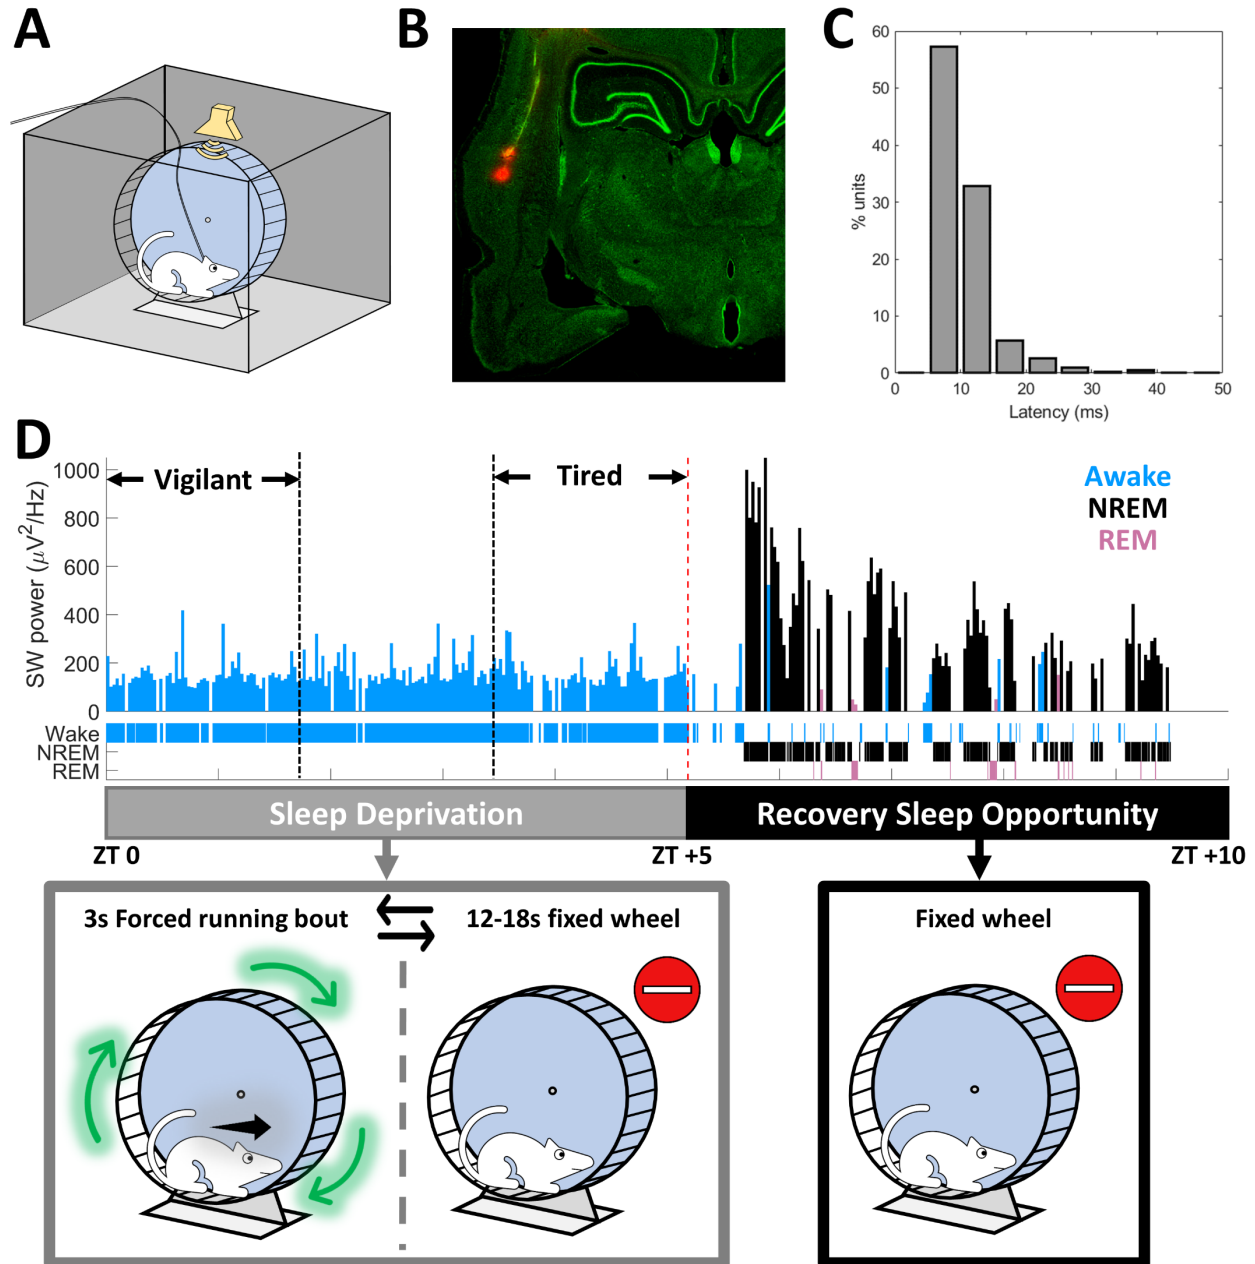

136 **Figure 1. Experimental Setup.** A) Experimental setup – Wistar rats were placed inside an acoustic chamber on a  
137 a motorized running wheel operated intermittently, with an ultrasonic speaker for auditory stimulation and video  
138 synchronized with continuous EEG/EMG/intracranial electrophysiology. B) Histology of microwires traces from an  
139 array targeting the auditory cortex C) Distribution of response latencies to click stimuli across all responsive units  
140 ( $n=423$ ) attesting to successful micro-electrode targeting to early auditory cortex. D) Top: Representative hypnogram  
141 (time-course of sleep/wake states, top) along with dynamics of slow wave activity (SWA, EEG power <math><math>\mu V^2/Hz</math></math>  
142 in 100s time bins. Bottom: Schematic description of experimental paradigm. Rats were sleep deprived for five hours  
143 (zeitgeber time [ZT] 0-5) via intermittent 3s forced running bouts, followed by five hours of recovery sleep  
144 opportunity (ZT 5-10), while auditory stimulation was performed continuously throughout the entire experiment  
145 with short ( $\sim 2s$ ) inter-stimulus-intervals, irrespective of wheel movements.

146 calculating the tuning width (FWHM, red lines in Fig. 2A) and computing its Modulation Index (MI) across  
147 conditions (Fig. 2b, Methods). In line with our hypothesis, we could not reveal a significant change in  
148 tuning width across conditions ( $p=0.529$ ,  $t_{197}=-0.631$ , Linear Mixed Effects [LME] Model). Indeed, the  
149 mean modulation across conditions was  $-1.85\pm 2.09\%$ , representing only a 1.85% mean decrease in tuning  
150 width during the Tired condition. Next, we went beyond tuning width and examined more generally  
151 whether the frequency tuning profile of each neuron is stable across states, representing additional  
152 features such as preferred frequency and temporal dynamics of tuned responses. To this end, we  
153 calculated the signal correlation between STRF maps in Vigilant and Tired conditions (Fig. 2C middle). We  
154 then compared it with signal correlation benchmarks for minimal correlation (Fig. 2C left: different units  
155 in different conditions) and maximum correlation (Fig. 2C right: same units, between 1<sup>st</sup> and 2<sup>nd</sup> halves of  
156 data within the same condition, Methods). We found that the STRF signal correlation between Vigilant  
157 and Tired conditions (middle bar,  $0.638\pm 0.012$ ) was significantly higher than between different units (left  
158 bar,  $0.219\pm 0.009$ ,  $p=4.53 \times 10^{-18}$ ,  $t_{197}=9.57$ , LME), and virtually as high as the signal correlation within  
159 each condition (middle vs. right bar,  $0.638\pm 0.012$  vs.  $0.647\pm 0.012$ ;  $p=0.16$ ,  $t_{197}=-1.41$ , LME). Given a finite  
160 number of trials and some inevitable degree noise in the data, STRF profiles across Vigilant and Tired  
161 conditions are as similar as they possibly can be. Thus, both tuning width and the signal correlation of  
162 STRF profiles were invariant to changes in arousal states during sleep deprivation.

163 We proceeded to analyze neuronal responses to 500ms click trains at different rates (Fig. 2D, 2, 10, 20 &  
164 30 clicks/s in 11 experimental sessions and 40 clicks/s in 19 experimental sessions). We first quantified  
165 onset response magnitude to the 40 clicks/s stimulus, as well as spontaneous (baseline) firing rate  
166 preceding stimulus onset across all responsive units (65.3%, 324 of 496 units) in Vigilant and Tired  
167 conditions. As can be seen in a representative unit (Fig. 2D), the spontaneous firing rate did not change  
168 between conditions. Similarly, the onset response (gray shading, [0-30]ms relative to stimulus onset) was  
169 similar in magnitude across conditions. Quantitative analysis across the entire dataset (Fig 2E, two  
170 leftmost bars) revealed a slight reduction ( $-5.1\pm 1.1\%$ ) in spontaneous firing during the Tired condition  
171 ( $p=0.0085$ ,  $t_{323}=-2.65$ , LME), while onset FR did not exhibit significant modulation ( $-0.52\pm 1.17\%$ ,  $p=0.92$ ,  
172  $t_{323}=0.1$ , LME). Overall, some aspects of cortical auditory processing, including frequency tuning,  
173 spontaneous firing, and onset responses are largely preserved across Vigilant and Tired conditions during  
174 sleep deprivation.

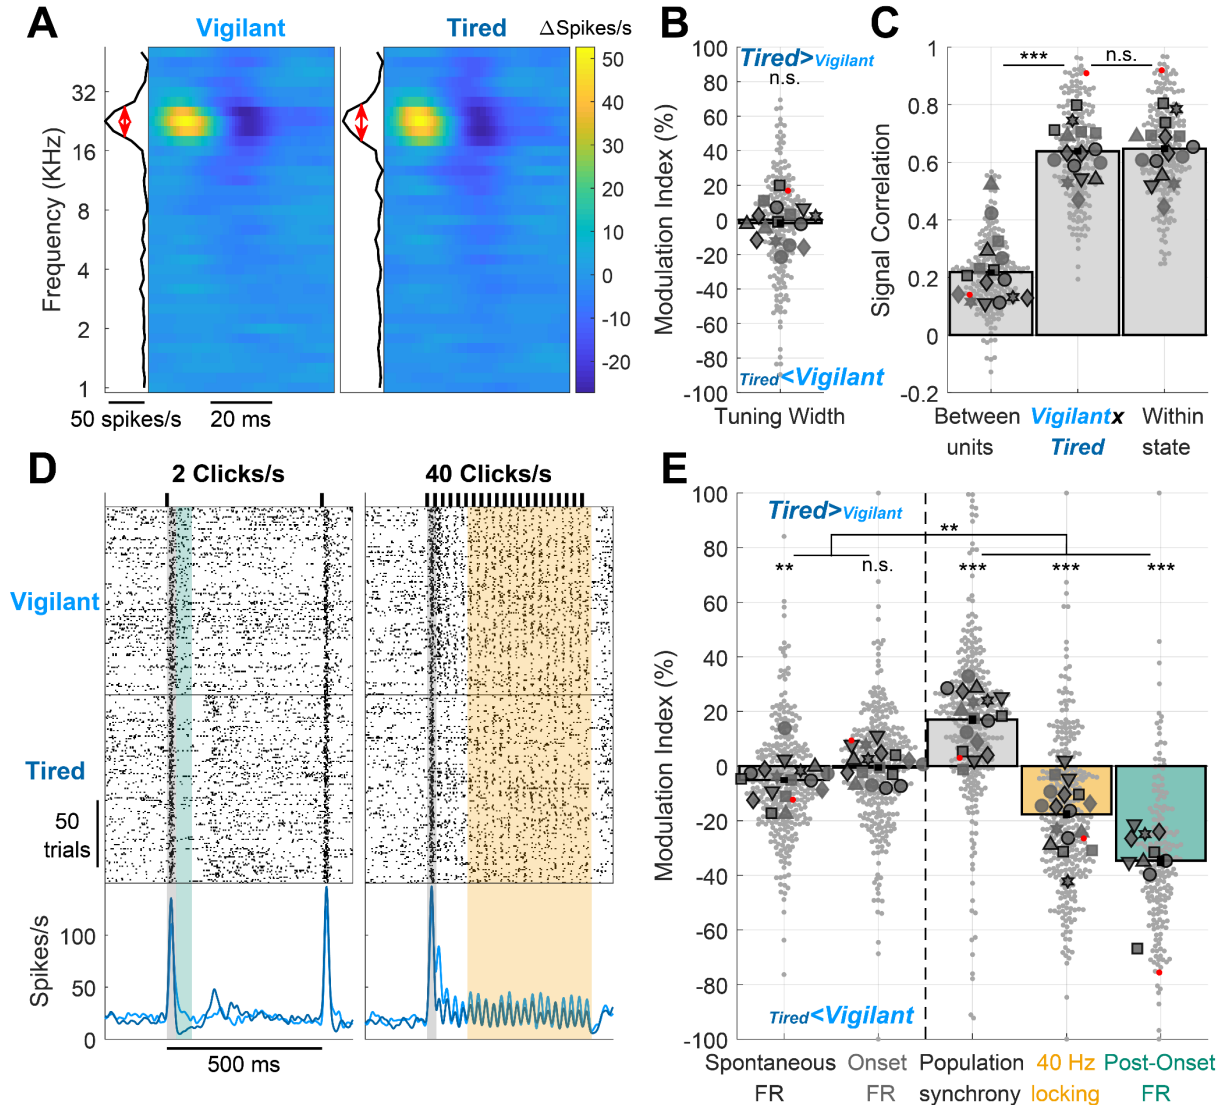

175 **Figure 2. Auditory cortex processing during sleep deprivation.** A) Representative spectro-temporal receptive field  
 176 (STRF) of a unit in auditory cortex showing preserved frequency tuning across Vigilant and Tired conditions (left and  
 177 right, respectively). B) Modulation of frequency tuning width (Tired vs. Vigilant conditions) for all tuned units ( $n=198$   
 178 out of 496 total) and sessions ( $n=16$ ). C) Signal correlations of frequency tuning across the entire dataset between  
 179 different units in the same session (left bar, benchmark for min. correlation), between Vigilant and Tired conditions  
 180 of the same individual units (middle bar) and between 1st and 2nd halves of trials in the same condition for the same  
 181 individual units (right bar, benchmark for max. correlation). Note that signal correlations are nearly as high across  
 182 Vigilant and Tired conditions as they are within the same condition. D) Representative raster and peri-stimulus time  
 183 histogram (PSTH) for a unit in response to 2 and 40 clicks/s click trains (left and right, respectively). Gray shading  
 184 marks the onset response [0-30]ms period. Green shading represents the post-onset [30-80]ms period where firing  
 185 rate was especially attenuated during the Tired condition. Yellow shading represents the [130-530]ms period where  
 186 sustained locking to the 40 click/s train was attenuated during the Tired condition. E) Modulation of  
 187 activity/response features between Tired and Vigilant conditions across units ( $n=327$ ) and sessions ( $n=17$ ). Features  
 188 (left to right) denote: spontaneous firing rate (FR), onset response FR, population synchrony, 40-Hz locking and  
 189 post onset FR. 2 click/s train were presented in 11 out of 19 sessions ('auditory paradigm A',  $n=199$  units). For Panels B,  
 190 C and E small gray markers represent individual units. large dark gray markers represent mean of all units in an  
 191 individual session. Each marker shape represents sessions from an individual animal. Markers with/without black  
 192 edges represent 'auditory paradigm A' and 'auditory paradigm B' sessions, respectively. Red dots point to the



193 representative unit presented in panels A and D. Dashed vertical line separates features minimally/not significantly  
194 affected by condition (spontaneous FR and onset response FR; on left) vs. features significantly that are disrupted in  
195 the Tired condition (population synchrony, 40Hz locking, and post-onset FR; on right).

196

197 **Population synchrony, entrainment to fast click-trains, and post-onset silence are strongly modulated**  
198 **by sleep deprivation**

199 Next, we tested the degree to which sleep deprivation affects other features of cortical auditory  
200 processing. We predicted that population synchrony would increase in Tired condition given the increased  
201 propensity of local neuronal populations to exhibit synchronous OFF-states in SD (Vyazovskiy et al., 2011).  
202 Quantifying “population coupling” (Okun et al., 2015), a measure of how correlated each unit’s firing is  
203 with the firing of the local population, we found a significant increase ( $17\pm 1.6\%$ ) in population synchrony  
204 during the Tired condition (Fig. 2E,  $p=5.2 \times 10^{-10}$ ,  $t_{323}=6.41$ , LME). We also predicted that entrainment  
205 to fast click trains (40 clicks/s) might be especially sensitive to sleep deprivation (Krom et al., 2020;  
206 Plourde, 1996; Sharon and Nir, 2018). As can be seen in a representative example (Fig. 2D, orange  
207 shading), the magnitude of sustained locking to the click train decreased during the Tired condition. A  
208 quantitative analysis across the entire dataset revealed a significant decrease of  $17.7\pm 1.5\%$  in 40Hz  
209 Locking (Fig. 2E orange bar,  $p=1.4 \times 10^{-6}$ ,  $t_{323}=-4.92$ , LME).

210 When presenting click trains at slower rates (2 & 10 clicks/s, n=11 sessions), we observed that the onset  
211 response ([0,30]ms) was followed by a post-onset period ([30,80]ms) exhibiting robust firing attenuation  
212 in the Tired condition (Fig. 2D left, green shading). Indeed, post-onset firing was significantly attenuated  
213 in the Tired condition compared to the Vigilant condition ( $34.6\pm 1.9\%$ , Fig. 2E green bar,  $p=4.6 \times 10^{-14}$ ,  
214  $t_{195}=-8.14$ , LME). Post-onset firing reduction emerged as a particularly state-sensitive aspect of the cortical  
215 auditory response, showing significantly stronger modulation than population synchrony and 40Hz locking  
216 ( $p \leq 0.0151$ ,  $df=195$ , LME). Analysis of variance among the distinct features of cortical auditory processing  
217 confirmed that they are differentially modulated by SD ( $p=2.8 \times 10^{-4}$ ,  $n=7$  animals, Friedman test). Pair-  
218 wise comparisons revealed that while spontaneous firing rates and onset responses were largely  
219 preserved, population synchrony, 40-Hz click train locking, and post-onset firing were modulated  
220 significantly more strongly than the former two features ( $p \leq 0.0025$ ,  $df=323$  or  $195$ , LME). In addition, an  
221 hour-by-hour analysis revealed that auditory processing features that were sensitive to SD exhibited  
222 gradually accumulating changes, corresponding to gradually accumulating sleep pressure (Supp. Fig. 1).

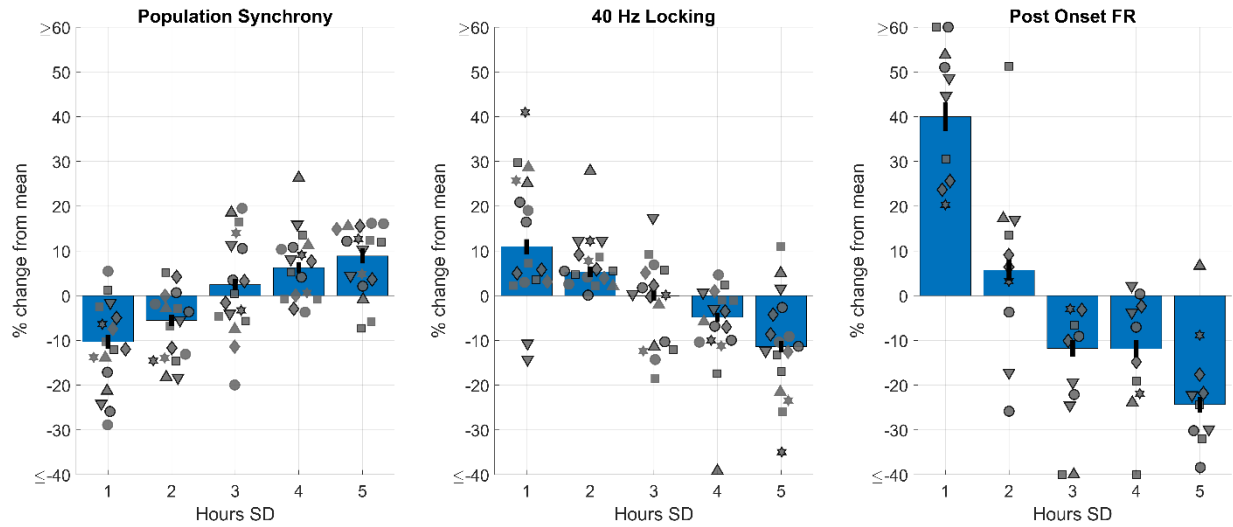

223

224 **Supplementary Figure 1 (relates to Fig. 2).** Gradual changes in SD-sensitive 'motifs'. Mean % changes at 1-hour time  
225 bins (20% of trials) during the SD period for three different sensitive neural processing 'motifs': population synchrony  
226 (left), 40-Hz click train locking (middle) and post-onset FR (right). Individual markers depict mean % change of all  
227 units in a single session. Different marker shapes represent different animals. Bars and black lines depict the mean  
228 and SEM across all sessions, respectively.

229

### 230 **The effects of sleep deprivation on cortical auditory processing mimic those of NREM sleep**

231 Previous studies have shown that during Tired conditions upon SD, features of NREM sleep activity (e.g.  
232 slow/theta activities and OFF-states) 'invade' the ongoing activity of cortical circuits (Finelli et al., 2000;  
233 Nir et al., 2017; Vyazovskiy et al., 2011). We wondered if the same is true for stimulus-driven activity, and  
234 whether it can already be observed in early sensory cortex. To test this, we compared neural activity and  
235 auditory responses during the Vigilant condition with those during the 5h recovery sleep period (Fig. 3),  
236 when rats spent  $48 \pm 7.5\%$  of time in NREM sleep,  $22 \pm 7.6\%$  of time in wakefulness, and  $6.5 \pm 4.2\%$  of time  
237 in REM sleep (mean  $\pm$  SD, additional intervals in transition or undetermined states, not analyzed further).  
238 We hypothesized that features showing similarity across Vigilant and Tired conditions will also be invariant  
239 to full-fledged NREM sleep, whereas changes observed during SD will be accentuated in recovery sleep  
240 data.

241 Indeed, frequency tuning, spontaneous firing, and onset responses were similar across Vigilant and NREM  
242 sleep conditions. Fig. 3A shows an example STRF during Vigilant and NREM sleep conditions. As observed  
243 during SD, full-fledged NREM sleep did not alter neuronal frequency tuning. Across the entire dataset,  
244 mean frequency tuning width did not significantly change ( $-1.18 \pm 1.25\%$ ,  $p=0.642$ ,  $t_{197}=-0.47$ , LME), and  
245 the STRF profile signal correlation (Fig. 3D) between Vigilant and NREM sleep conditions (middle bar) was

246 nearly as high as the signal correlation within each condition (right bar). Although the difference in signal  
 247 correlation was highly significant statistically ( $p=3.5\times 10^{-11}$ ,  $t_{197}=-7.02$ , LME), its magnitude was moderate:  
 248 signal correlation between Vigilant and NREM sleep was 87.4% of the mean signal correlation within each  
 249 condition (0.589 vs. 0.674).

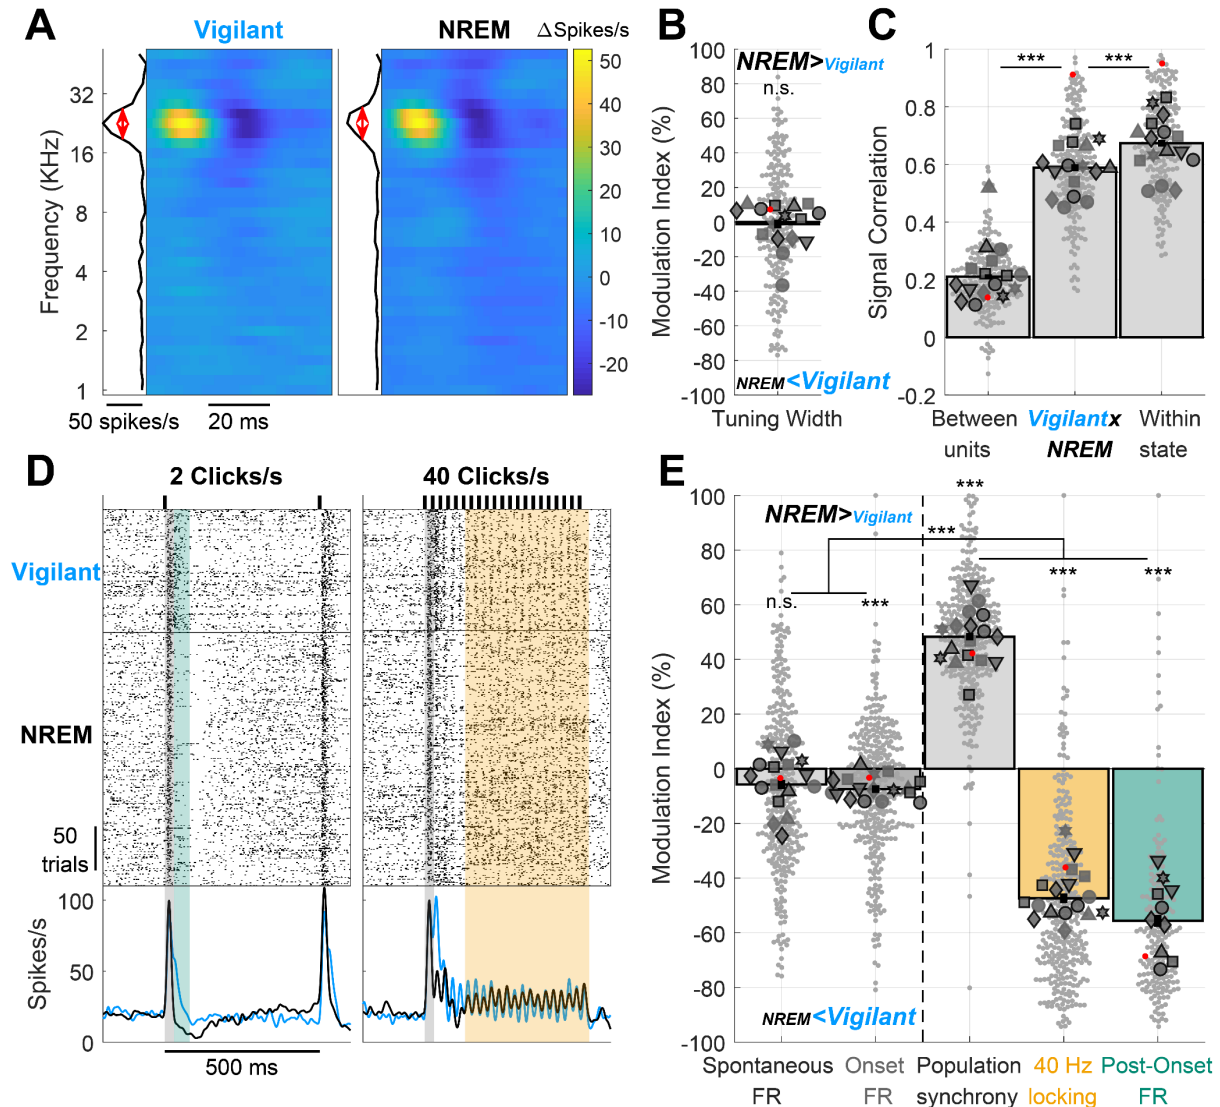

250 **Figure 3. Auditory cortex processing during recovery NREM sleep vs. vigilant wakefulness.** Same as Fig. 2 but  
 251 comparing recovery NREM sleep to the Vigilant condition. A) Representative spectro-temporal receptive field (STRF)  
 252 of a unit in auditory cortex showing preserved frequency tuning across Vigilant and NREM sleep conditions (left and  
 253 right, respectively). B) Modulation of frequency tuning width (NREM sleep vs. Vigilant conditions) for all units (n=200)  
 254 and sessions (n=16). C) Signal correlations of frequency tuning across the entire dataset between different units in  
 255 the same session (left bar), between Vigilant and NREM sleep conditions of the same individual units (middle bar)  
 256 and between 1st and 2nd halves of trials in the same condition for the same individual units (right bar). Note that  
 257 signal correlations are nearly as high across Vigilant and NREM sleep conditions as they are within the same  
 258 condition. D) Representative raster and peri-stimulus time histogram (PSTH) for a unit in response to 2 and 40 clicks/s  
 259 click trains (left and right, respectively). Gray shading marks the onset response [0-30]ms period. Green shading  
 260 represents the post-onset [30-80]ms period where firing rate was especially attenuated during the Tired condition.

261 Yellow shading represents the [130-530]ms period where sustained locking to the 40 click/s train was attenuated  
262 during the NREM sleep condition. E) Modulation of activity/response features between NREM sleep and Vigilant  
263 conditions across units (n=327) and sessions (n=17). Features (left to right) denote: spontaneous firing rate (FR),  
264 onset response FR, population synchrony, 40-Hz locking and post onset FR. 2 click/s train were presented in 11 out  
265 of 19 sessions ('auditory paradigm A', green bar, n=199 units, 10 session). For Panels B,C,E, small gray markers  
266 represent individual units. large dark gray markers represent mean of all units in an individual session. Each marker  
267 shape represents sessions from an individual animal. Markers with/without black edges represent 'auditory  
268 paradigm A' and 'auditory paradigm B' sessions, respectively. Red dots point to the representative unit presented in  
269 panels A and D. Dashed vertical line separates features minimally/not significantly affected by condition  
270 (spontaneous FR and onset response FR; on left) vs. features that are significantly disrupted in the NREM sleep  
271 condition (population synchrony, 40Hz locking, and post-onset FR; on right).

272

273 Fig. 3D shows that for this representative unit, spontaneous firing and onset responses were also  
274 unchanged during NREM sleep, contrasting with strong modulation of post-onset firing and 40Hz-locking  
275 (green and yellow shading, respectively). Analysis of the entire dataset confirmed a modest attenuation  
276 of spontaneous firing and onset responses during recovery NREM sleep (Fig 3E left,  $5.78 \pm 1.68\%$  and  
277  $7.45 \pm 1.38\%$ , respectively), that was statistically significant only for onset responses ( $p = 1.1 \times 10^{-6}$ ,  $t_{323} = -$   
278  $4.98$  for onset response and  $p = 0.16$ ,  $t_{323} = -1.39$  for spontaneous FR, LME). In sharp contrast, these modest  
279 changes were overshadowed by strong modulations of population synchrony ( $48.3 \pm 1.3\%$ ), 40 Hz Locking  
280 ( $47.4 \pm 1.73\%$ ) and post-onset firing ( $55.7 \pm 2.19\%$ ) during NREM sleep (Fig. 3E right,  $p \leq 1.2 \times 10^{-27}$ ). As was  
281 the case for SD, the differential modulation of specific features of cortical auditory processing by NREM  
282 sleep was highly significant ( $p = 1.7 \times 10^{-4}$ , n=7 animals, Friedman test) where population synchrony, 40Hz-  
283 locking, and post-onset firing were significantly more modulated than spontaneous firing and onset  
284 responses ( $p \leq 2.8 \times 10^{-16}$  for all pair-wise comparisons, df=323 or 195, LME). Overall, the same aspects of  
285 cortical auditory processing that showed maximal modulation during SD (population synchrony, 40Hz  
286 Locking, post onset FR) were maximally modulated during recovery NREM sleep.

287

### 288 **Sleep deprivation and NREM sleep entail sensory adaptation at lower frequencies**

289 To better understand how Tired and NREM sleep states disrupt locking to click trains, we presented click  
290 rates at various rates (2, 10, 20, 30 and 40 clicks/s, n=11 sessions). As can be seen in a representative  
291 response (Fig. 4A), sustained locking to slower click trains (2 and 10 clicks/s, yellow shading) was stable  
292 during the Tired and NREM sleep conditions relative to Vigilant. In contrast, locking to faster click trains  
293 ( $\geq 20$  clicks/s) showed strong attenuation. We thus quantified the modulation in response locking across  
294 the entire dataset during SD (Tired vs. Vigilant, 194 units, Fig 4B) and during NREM sleep (NREM vs.  
295 Vigilant, Fig 4C). Locking to different click rates was differentially modulated by SD (Fig. 4B,  $p = 9.7 \times 10^{-4}$ ,

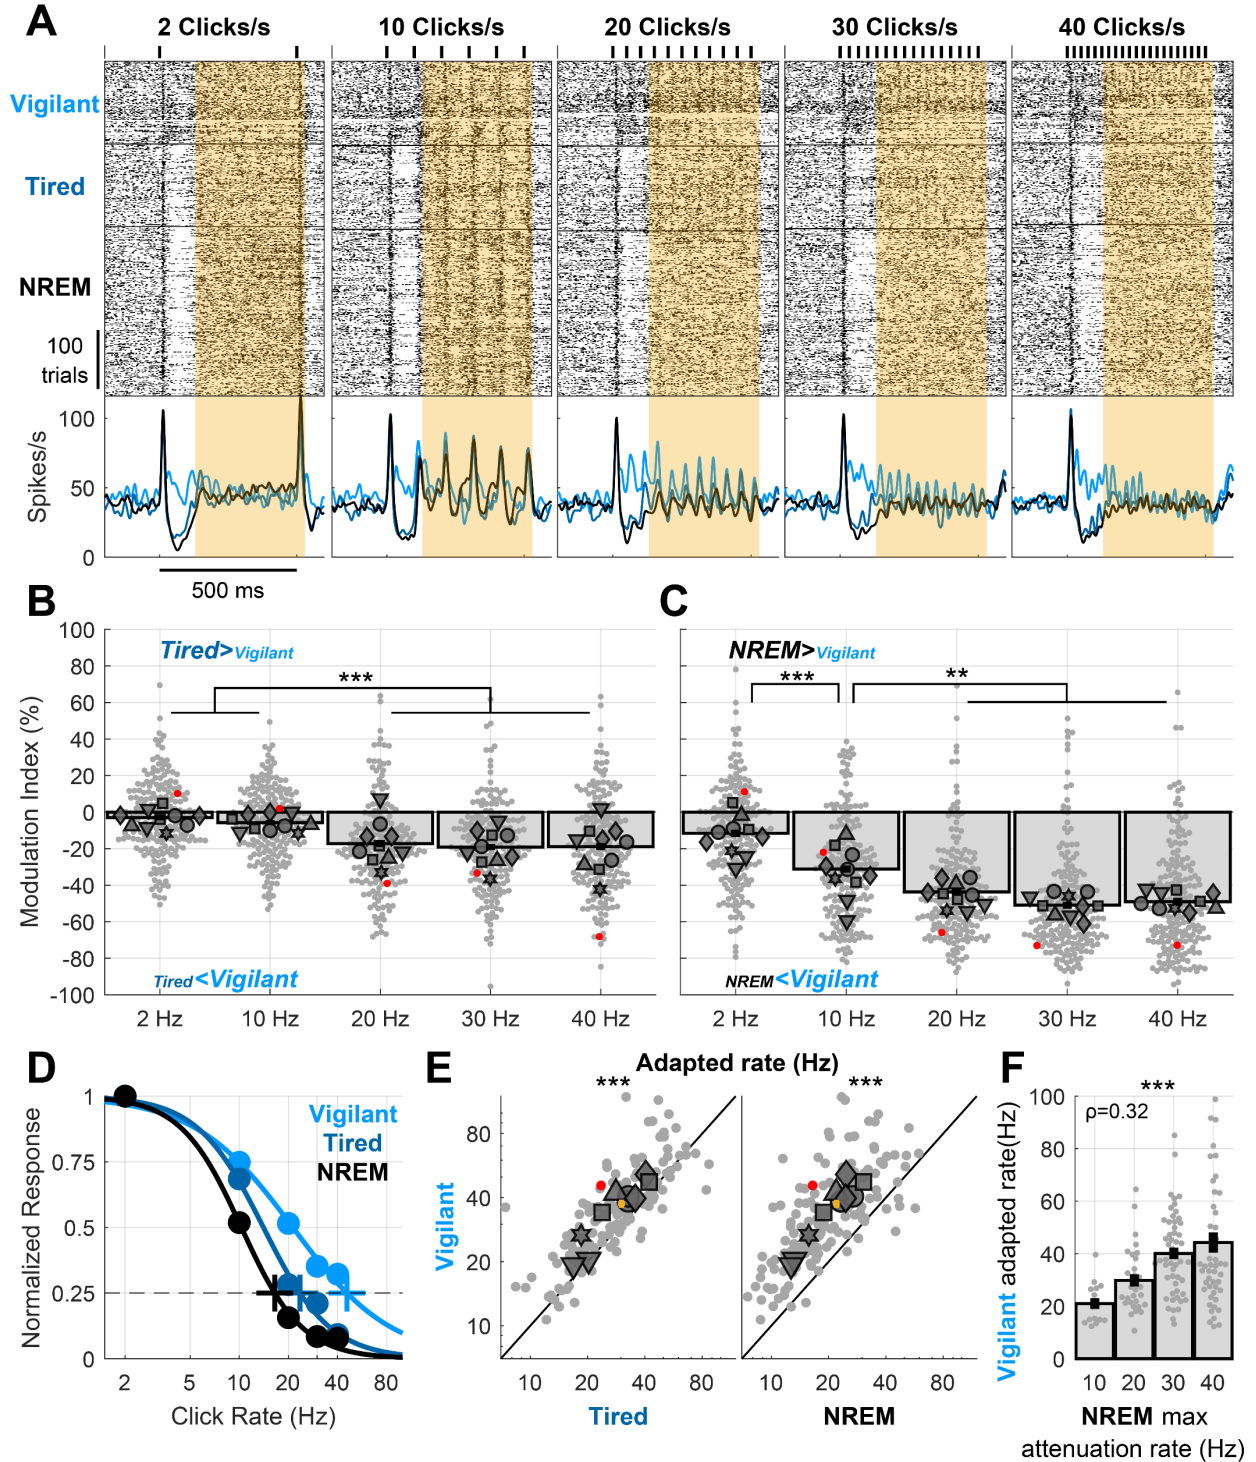

296

297 **Figure 4. Recovery NREM sleep and sleep deprivation both entail a shift in sensory adaptation.** A) Representative  
 298 unit raster and PSTH responses to 2, 10, 20, 30 and 40 clicks/s responses. Note that locking to click trains is  
 299 progressively more disrupted in Tired/NREM sleep conditions with increasing click train rate. B) Modulation of  
 300 locking to different click rates (Tired vs. Vigilant) for all units (n=197) and sessions (n=10). Locking to fast click trains  
 301 ( $\geq 20$  clicks/s) is significantly attenuated during sleep deprivation ('Tired'). C) Same as B but comparing recovery  
 302 NREM sleep to the Vigilant condition, showing increasingly stronger attenuation for faster click trains. D) Normalized

303 locked responses in a representative unit (y-axis) as a function of click rate (x-axis) separately for Vigilant (cyan),  
304 Tired (blue), and recovery NREM sleep (green) conditions. Circles represent the observed locked response to each  
305 click rate in each condition. Thick traces connecting the circles represent the best sigmoid fit. Cross represents the  
306 estimated 'adapted click-rate', i.e. the click rate for which the normalized response would be 25% of maximum. E)  
307 Left: scatter plot of the 'adapted click-rate' for all units and sessions, comparing Vigilant (y-axis) with Tired conditions  
308 (y-axis); Right: same when comparing Vigilant (y-axis) with recovery NREM sleep (x-axis). Yellow cross represents  
309 mean±SEM across all units (n=150). F) observed click rate for which units demonstrate maximal attenuation between  
310 Vigilant and NREM sleep conditions (x-axis, Methods) vs. the estimated 'adapted click-rate' during the Vigilant  
311 condition (y-axis). Note that units with lower 'adapted click-rate' during wakefulness also show lower attenuation  
312 rates when comparing NREM sleep vs. Vigilant. For Panels B,C,E,F: small gray markers represent individual units.  
313 Large dark gray markers represent mean of all units in an individual session. Red dots point to the representative  
314 unit presented in panels A and D.

315

316 n=6 animals, Friedman test). Pairwise comparisons revealed that locking to faster click-trains (20, 30 & 40  
317 clicks/s) was significantly more attenuated than to slower click trains (2 & 10 Clicks/s), with an average  
318 attenuation of 18.4% vs. 4.4%, respectively (for all comparisons  $p \leq 2.6 \times 10^{-4}$ ,  $df=193$ , LME, mean MI: -  
319  $3.05 \pm 1.46\%$ ,  $-5.71 \pm 1.36\%$ ,  $-17.2 \pm 1.75\%$ ,  $-19.1 \pm 1.67\%$  and  $-18.9 \pm 1.87\%$ , for 2, 10, 20, 30 and 40 clicks/s,  
320 respectively). NREM sleep showed qualitatively similar and stronger effects (Fig. 4C,  $p=0.0036$ ,  $n=6$   
321 animals, Friedman test, mean MI:  $-11.6 \pm 1.93\%$ ,  $-31.2 \pm 1.99\%$ ,  $-43.7 \pm 1.84\%$ ,  $-50.9 \pm 1.98\%$  and  $-49 \pm 2.05\%$ ,  
322 for 2, 10, 20, 30 and 40 clicks/s, respectively). Pairwise comparisons revealed a gradual modulation during  
323 NREM sleep depending on click-train rate ( $-11.6\%$  for 2 click/s versus  $-31.2\%$  for 10 clicks/s, and even  
324 stronger attenuations for 20, 30 & 40 clicks/s,  $p \leq 0.0057$ ,  $df=193$ , for all comparisons, LME).

325 To capture how different arousal states affect the entire sensory adaptation curve, we fitted a sigmoid  
326 function to describe how response attenuation changes with increasing click rate (Methods). Fig 4D shows  
327 this fit for the same unit example shown in Fig. 4A. We then estimated the "adapted rate", i.e. the click  
328 rate for which the response is attenuated to 25% of its maximum (Methods), for each arousal condition  
329 separately (crosses in Fig 4D). For the example unit shown, the estimated *adapted rate* during the Vigilant  
330 condition was 45.6 clicks/s, decreased to 23 clicks/s during the Tired condition, and decreased further to  
331 16.6 clicks/s during NREM sleep. A quantitative analysis across the entire dataset (Fig. 4E) revealed that  
332 SD decreased the adapted rate by  $15.6 \pm 1.84\%$  (Fig. 4E left,  $p=1.1 \times 10^{-7}$ ,  $t_{146}=-5.58$ , LME, Vigilant: 32.9 vs.  
333 Tired: 26.8 clicks/s). An even stronger decrease of  $36.3 \pm 1.87\%$  was observed in NREM sleep (Fig. 4E right,  
334  $p=3.9 \times 10^{-36}$ ,  $t_{146}=-16.9$ , LME, Vigilant: 32.9 vs. NREM sleep: 19.7 clicks/s). Overall, Tired and NREM sleep  
335 low-arousal states shift the sensory adaptation gain curve to lower frequencies.

336 Could it be that some neurons are strongly adapted to begin with, and these are the neurons who are  
337 most sensitive to changes in state? To examine this, we tested whether neurons that show a low adapted

338 rate during the Vigilant condition (e.g. weak locking already for 10 click/s) may correspondingly show a  
339 strong attenuation at lower frequencies during NREM sleep (compared to the Vigilant condition). We  
340 calculated for each neuron its estimated '*adapted rate*' during the Vigilant condition, and compared it to  
341 the click rate showing maximal attenuation during NREM sleep (Fig. 4F, Methods). For example, the  
342 representative unit in Fig. 4A,D shows a close-to-maximal attenuation during NREM sleep already at 20  
343 clicks/s (red points in Fig. 4C), while its estimated '*adapted rate*' during the Vigilant condition was 45.6  
344 clicks/s (light blue cross in Fig. 4D). Analysis across the entire dataset confirmed the significant correlation  
345 between these two measures (Fig. 4F,  $p=6.2\times 10^{-5}$ ,  $\rho=0.324$ , for  $n=147$  units, Spearman Correlation).  
346 Such correlation was not significant when comparing Vigilant and Tired conditions ( $p=0.46$ ,  $\rho=0.062$ ),  
347 possibly due to the weaker modulation observed in SD. Thus, we found that for a given neuron, the  
348 attenuation during NREM sleep is dictated by the sensory adaptation curve during vigilance, such that  
349 neurons showing significantly adapted response at lower click rates are also attenuated during NREM at  
350 lower click rates. Finally, linear modeling revealed that reduced locking to fast click trains cannot be simply  
351 explained by post-onset reduction in firing (Supp. Fig 2).

352

### 353 **Stimulus-induced silent intervals are more sensitive to sleep deprivation than spontaneous silences**

354 The most sensitive measure of cortical auditory processing in low-arousal states was a reduction or  
355 complete cessation of firing following the onset response in Tired and NREM sleep conditions (Fig. 5A Left,  
356 [30,80]ms post click, green shading). Given that such stimulus-induced silence was reminiscent of an '*OFF-*  
357 *state*' observed in ongoing activity of local neuronal populations during NREM sleep and SD (Vyazovskiy  
358 et al., 2011), we examined if it likewise represents a network-wide event or, alternatively, simply reflects  
359 a refractory-like period in spiking of individual neurons exposed by the onset response to the auditory  
360 stimulus. To test this, we compared each auditory trial (with its stimulus-induced onset response and  
361 post-onset silence, Fig 5A, left) with a matched interval of ongoing activity containing similar spiking bursts  
362 (Fig. 5A, right). We found that post-onset FR reduction was only apparent following auditory stimulation  
363 and onset responses but not present in spontaneous firing (Fig. 5A,B, green shading): baseline-normalized  
364 post onset FR was gradually reduced from  $0.98\pm 0.039$  during the Vigilant condition to  $0.63\pm 0.033$  during  
365 the Tired condition, and even further to  $0.38\pm 0.023$  during NREM sleep (Fig. 5C,  $p<3 \times 10^{-7}$  for all pair-  
366 wise comparisons,  $df=195$ , LME). By contrast, FR following spontaneous bursts only revealed marginal  
367 changes across conditions: Vigilant:  $1.08\pm 0.016$ , Tired:  $1.01\pm 0.016$ , NREM:  $0.98\pm 0.02$  ( $p=0.032$  for  
368 comparing Vigilant and Tired conditions,  $p>0.05$  for all other comparisons,  $df=195$ , LME). The attenuation

369 in click-induced post-onset FR during the Tired condition ( $34.2 \pm 1.95\%$  relative to vigilance) was  
370 significantly larger than that following spontaneous-bursts ( $5.2 \pm 1.7\%$ ,  $p = 1.5 \times 10^{-18}$ ,  $t_{195} = 9.75$ , LME), as  
371 was also true for NREM sleep ( $p = 1.5 \times 10^{-16}$ ,  $t_{195} = 9.04$ , LME). Thus, post-onset suppression isn't simply  
372 a property of individual neurons that reduce firing after vigorous activity, but represents a network event  
373 induced by the stimulus.

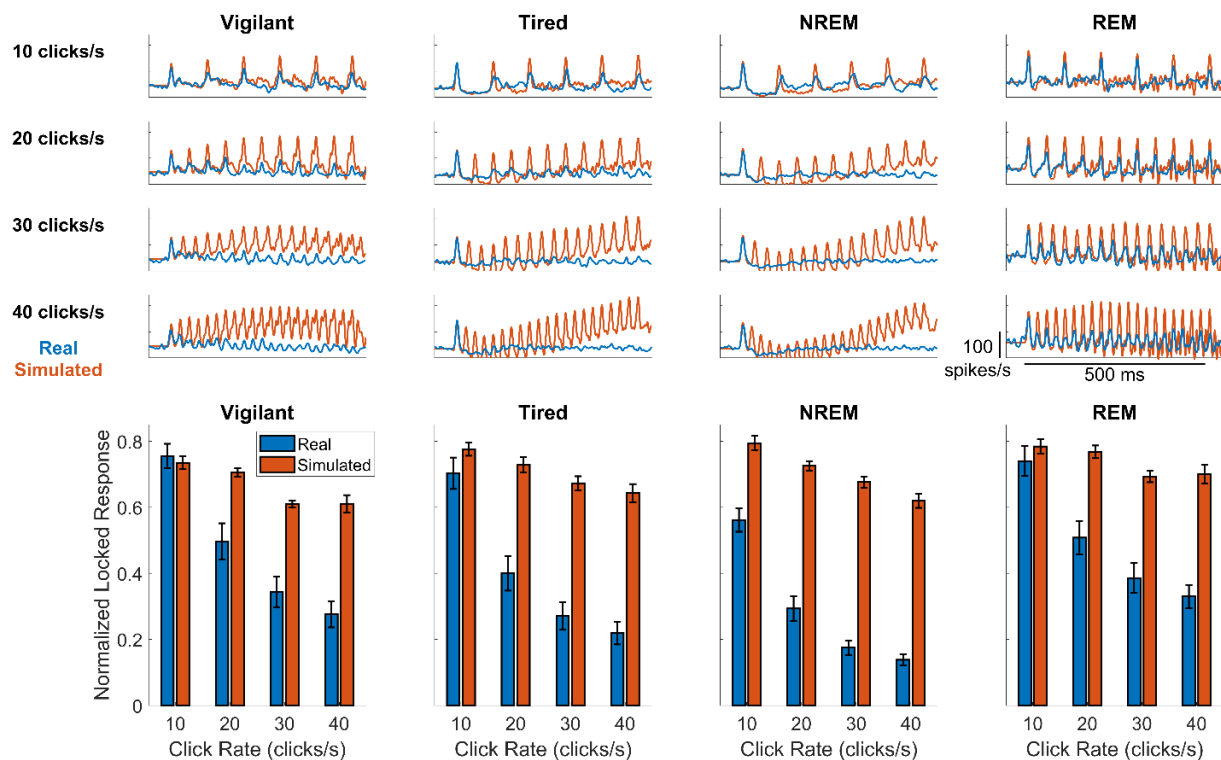

374 **Supplementary Figure 2 (relates to Fig. 4). Post-onset FR reduction doesn't explain reduced locking to rapid click**  
375 **trains.** We examined if decreased locking to rapid click trains may be trivially explained by post-onset FR suppression  
376 that may coincide with the evoked response to subsequent clicks. We constructed a simple linear model aiming to  
377 predict the response to different click trains by shifting in time and summing up the average response to an individual  
378 click (Methods). Top) an example of individual unit locked response to different click rates (rows) across different  
379 conditions (columns). Blue traces represent the actual response while red traces represent the linear model. For this  
380 unit the model predicts much stronger locking to fast click trains than that is observed in practice (compare red to  
381 blue traces at the bottom row). Bottom) mean normalized locked response for different conditions (columns) and  
382 click rates (different bars). Blue and red bars represent the mean real and modeled response across all units,  
383 respectively. The large gap for fast click trains (especially for NREM and Tired conditions) demonstrates that post-  
384 onset FR reduction seen in response to individual clicks doesn't trivially explain reduced locking to fast click trains.



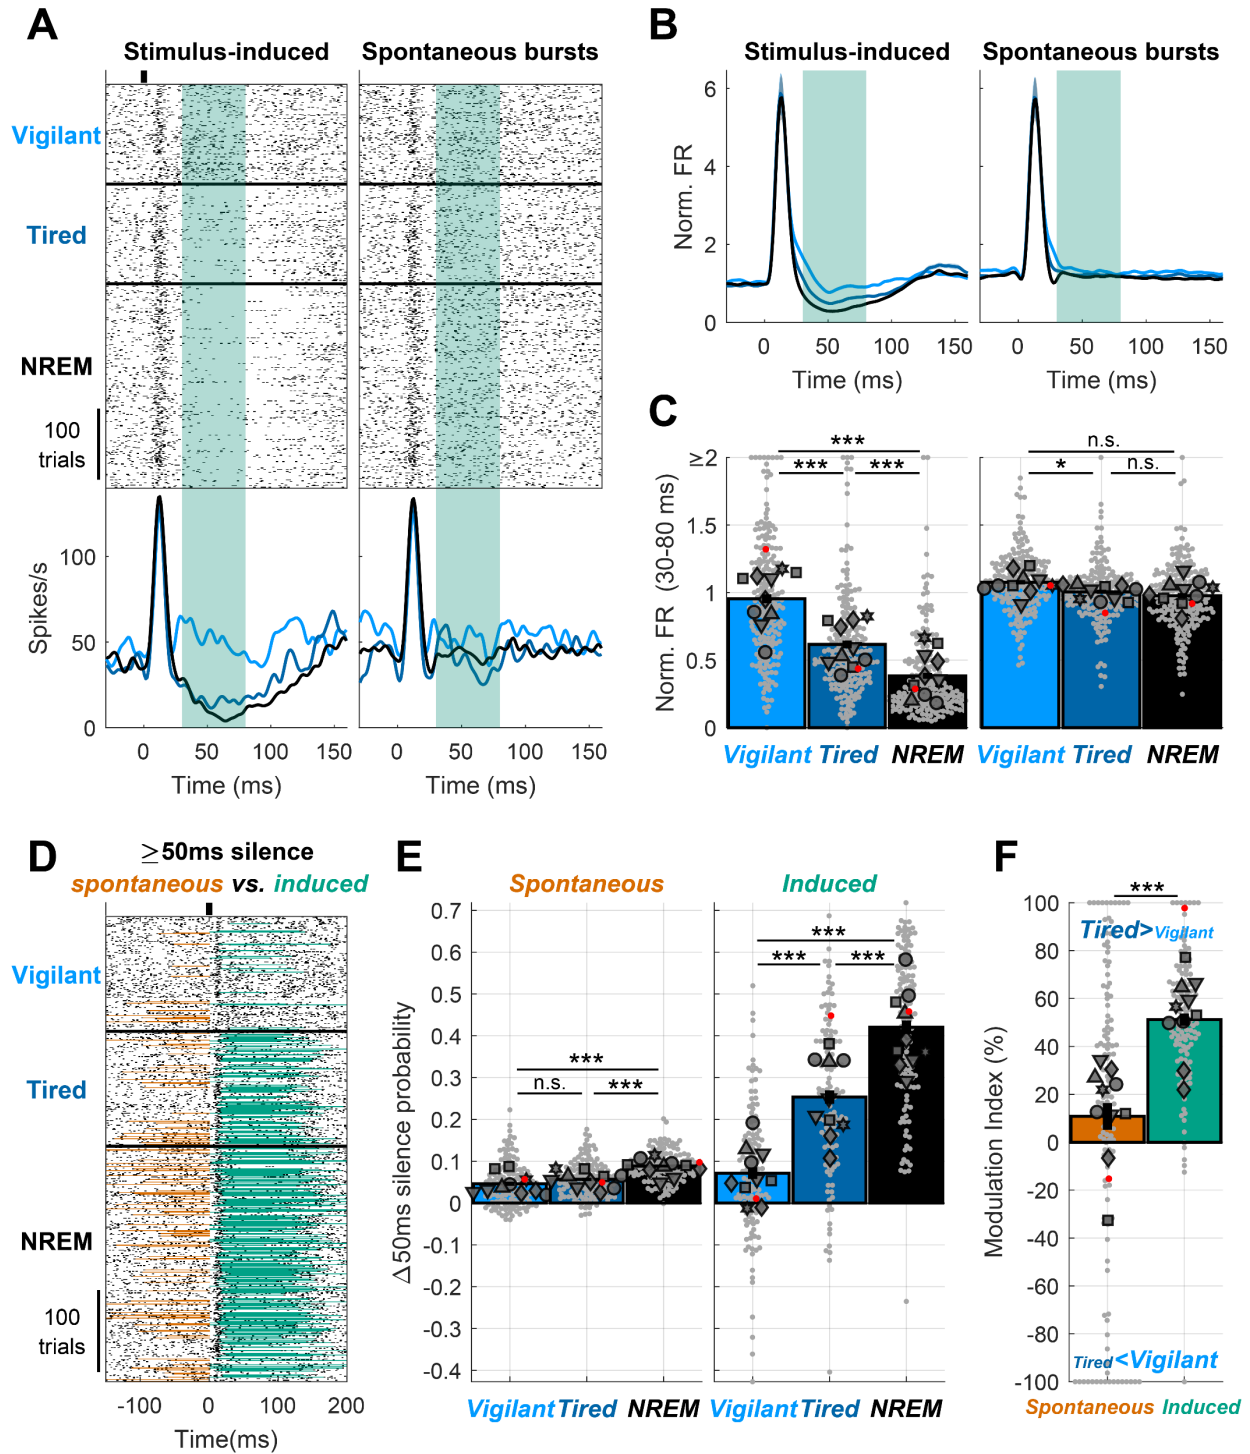

385

386 **Figure 5. Stimulus-induced silent intervals are especially sensitive to sleep deprivation.** A) Representative unit  
 387 raster and PSTH response to a click across Vigilant, Tired and NREM sleep conditions (left) and trial-by-trial matched,  
 388 equally strong, spontaneous bursts (matching the [0,30]ms click onset response) of the same unit (right). Note that  
 389 there is no post-onset FR reduction following spontaneous bursts. Green shading represents the post-onset  
 390 [30,80]ms period. B) mean normalized PSTH of all units (n=195) for the stimulus(click)-induced response (left), and

391 matched spontaneous bursts (right) across Vigilant, Tired and NREM sleep conditions. C) Post-onset normalized FR  
392 across Vigilant, Tired and NREM sleep conditions for the stimulus-induced response (left) and the matched  
393 spontaneous bursts (right) for all units (n=195) and sessions (n=10). D) Representative unit raster and PSTH response  
394 to 2 clicks/s train across Vigilant, Tired and NREM sleep conditions. Silent intervals ( $\geq 50$ ms firing silence) just  
395 preceding ([-50,0]ms) or immediately following ([30,80]ms) stimulus onset are marked in orange and green,  
396 respectively. Note that spontaneous silent intervals (orange) are prevalent in NREM sleep but rare during the Tired  
397 condition (as in Vigilant), whereas stimulus-induced silent intervals (green) strongly increase in the Tired condition.  
398 E) Increase in silent intervals probability (relative to Poisson process with the same spontaneous firing rate) across  
399 Vigilant, Tired and NREM sleep conditions, separately for spontaneous (left) and stimulus-induced (right) silent  
400 intervals for all electrodes (n=126) and sessions (n=10). F) Modulation of the probability of spontaneous and  
401 stimulus-induced silent intervals across Tired vs. Vigilant conditions for all electrodes (n=126) and sessions (n=10).  
402 Stimulus-induced silent intervals show a larger and more reliable change upon sleep deprivation (comparing Tired  
403 and Vigilant conditions) relative to spontaneous intervals. Bars represent mean across all units/channels. Small gray  
404 markers represent individual units/channels. Large dark gray markers represent mean of all units/channels in an  
405 individual session. Red dots point to the representative unit presented in panels A and D.

406 Next, we complemented the analysis of graded firing rate reductions with a binary approach of detecting  
407 OFF periods – intervals of neuronal silence  $\geq 50$ ms, typically observed in ongoing sleep activity and in SD.  
408 Both spontaneous and stimulus-induced silent intervals (presumably OFF-states) were rare during the  
409 Vigilant condition but more frequent during NREM sleep (Fig. 5D). During the Tired condition (wakefulness  
410 after several hours of SD), stimulus-induced silent intervals were very frequent while spontaneous silent  
411 intervals continued to be rare. We analyzed the probability of spontaneous silent intervals relative to a  
412 random Poisson process (Fig. 5E, Methods) across the entire dataset, and found a graded modulation by  
413 arousal state (Vigilant:  $4.61 \pm 0.48\%$ , Tired:  $5.67 \pm 0.38\%$ , NREM sleep:  $8.87 \pm 0.33\%$ ,  $p=0.0057$ ,  $n=6$  animals,  
414 Friedman test). Pair-wise comparisons revealed that the probability in NREM sleep was significantly  
415 greater than other conditions ( $p \leq 9.7 \times 10^{-6}$ ,  $df=126$ , LME, compared to Vigilant and Tired conditions),  
416 while the increase from Vigilant to the Tired condition exhibited a non-significant trend ( $p=0.0501$ ,  $t_{125}=-$   
417  $1.98$ , LME). By contrast to spontaneous silent intervals, the probability of stimulus-induced silent intervals  
418 was higher and more strongly modulated by condition (Vigilant:  $7.14 \pm 1.38\%$ , Tired:  $25.4 \pm 1.63\%$ , NREM  
419 sleep =  $42 \pm 1.6\%$ ,  $p=0.0025$ ,  $n=6$  animals, Friedman test, Fig. 5B right,  $p \leq 4.1 \times 10^{-11}$ ,  $df=125$ , for all pairwise  
420 comparisons, LME). In the Vigilant condition, the probability of stimulus-induced silent intervals was not  
421 significantly different than that of spontaneous silent intervals ( $p=0.236$ ,  $t_{125}=1.19$ , LME, Spontaneous:  
422  $4.61 \pm 0.48\%$  vs. Induced:  $7.14 \pm 1.38\%$ ) but this difference was highly significant in the Tired and NREM  
423 sleep conditions ( $p \leq 9 \times 10^{-8}$ ,  $df=125$ , LME, for all comparisons, Spontaneous:  $5.67 \pm 0.38\%$ ,  $8.87 \pm 0.33\%$ , vs.  
424 Induced:  $25.4 \pm 1.63\%$ ,  $42 \pm 1.6\%$  for Tired and NREM sleep, respectively). Indeed, the mean modulation  
425 index comparing silent interval probability in Tired vs. Vigilant conditions (Fig. 5F) increased significantly  
426 from  $10.8 \pm 5.55\%$  for spontaneous silent intervals to  $51.2 \pm 2.5\%$  for stimulus-induced silent intervals  
427 ( $p=5.4 \times 10^{-5}$ ,  $t_{125}=4.18$ , LME). Overall, these results establish that stimulus-induced silent intervals

428 reveal a hidden facet of neural processing during SD that goes beyond what is observed in spontaneous  
429 activity.

430

### 431 **Auditory processing during REM sleep resembles the Vigilant condition, unlike NREM sleep**

432 REM sleep is a unique ('paradoxical') behavioral state that is characterized both by disengagement from  
433 the environment co-occurring with desynchronized cortical activity and often accompanied by vivid  
434 dreams(Nir and Tononi, 2010). Therefore, REM offers a unique lens through which to examine the changes  
435 in cortical auditory processing, potentially revealing which aspects are similar to NREM sleep (likely  
436 reflecting a general feature of sleep and sensory disengagement) and which aspects are similar to the  
437 Vigilant condition (likely reflecting a general feature of desynchronized cortical states).

438 We first observed that frequency tuning was stable during REM sleep (Fig. 6A). Across the entire dataset,  
439 tuning width was reduced by an average of 15% (Fig. 6B,  $p=3.3\times 10^{-4}$ ,  $t_{120}=-3.7$ , LME), while the signal  
440 correlation between the Vigilant and REM sleep conditions (Fig. 6C middle bar,  $0.547\pm 0.014$ ) was nearly  
441 as high (89.7%) as the maximal benchmark within each condition (Fig 6C,  $0.609\pm 0.014$ ,  $p=5.5\times 10^{-8}$ ,  $t_{120}=-$   
442  $5.8$ , LME). Next, examining different aspects of the neuronal activity and auditory response revealed that  
443 REM sleep exhibits a very similar profile to the Vigilant condition (Fig. 6D,E). Unlike NREM sleep, REM  
444 sleep was associated with high post-onset firing and strong locking to the 40 click/s train, as in the Vigilant  
445 condition. A quantitative analysis across the entire dataset revealed modest average difference between  
446 REM sleep and the Vigilant condition (all mean MI<21%, Fig. 6E). Moreover, in measures such as  
447 spontaneous firing and 40Hz-locking, REM sleep was even significantly higher than the Vigilant condition  
448 (Fig. 6E, all  $p<4.3\times 10^{-8}$ ,  $df=322$ , LME). Conversely, when contrasting REM sleep with NREM sleep, strong  
449 and reliable differences emerged (Fig. 6F). As was the case when comparing Vigilant condition with NREM  
450 sleep, different aspects of the neuronal activity and auditory response were differentially modulated by  
451 state (Fig. 6F,  $p=4.1\times 10^{-4}$ ,  $df=7$  animals, Friedman test). Again, the onset response was minimally  
452 affected by the state (MI:  $10.3\pm 1.32\%$ ,  $p=1.9\times 10^{-13}$ ,  $t_{323}=7.68$ , LME). Spontaneous firing increased by  
453  $26.8\pm 1.4\%$  during REM sleep compared to NREM sleep ( $p=2.7\times 10^{-21}$ ,  $t_{323}=10.2$ , LME). Even larger changes  
454 were observed when comparing population synchrony (MI:  $-37.5\pm 1.52\%$ ,  $p=1.04\times 10^{-16}$ ,  $t_{323}=-8.77$ , LME),  
455 40-Hz locking (MI:  $61.7\pm 1.35\%$ ,  $p=2.6\times 10^{-91}$ ,  $t_{323}=28.8$ , LME) and post onset firing (MI:  $64.4\pm 1.95\%$ ,  
456  $p=1.5\times 10^{-11}$ ,  $t_{195}=7.17$ , LME). The '*adapted rate*' (Fig. 6G) during REM sleep was higher than during the  
457 Vigilant condition, and increased on average from 31.8 to 38.8 clicks/s (Fig. 6H left,  $p=3.4\times 10^{-7}$ ,  $t_{135}=5.37$ ,

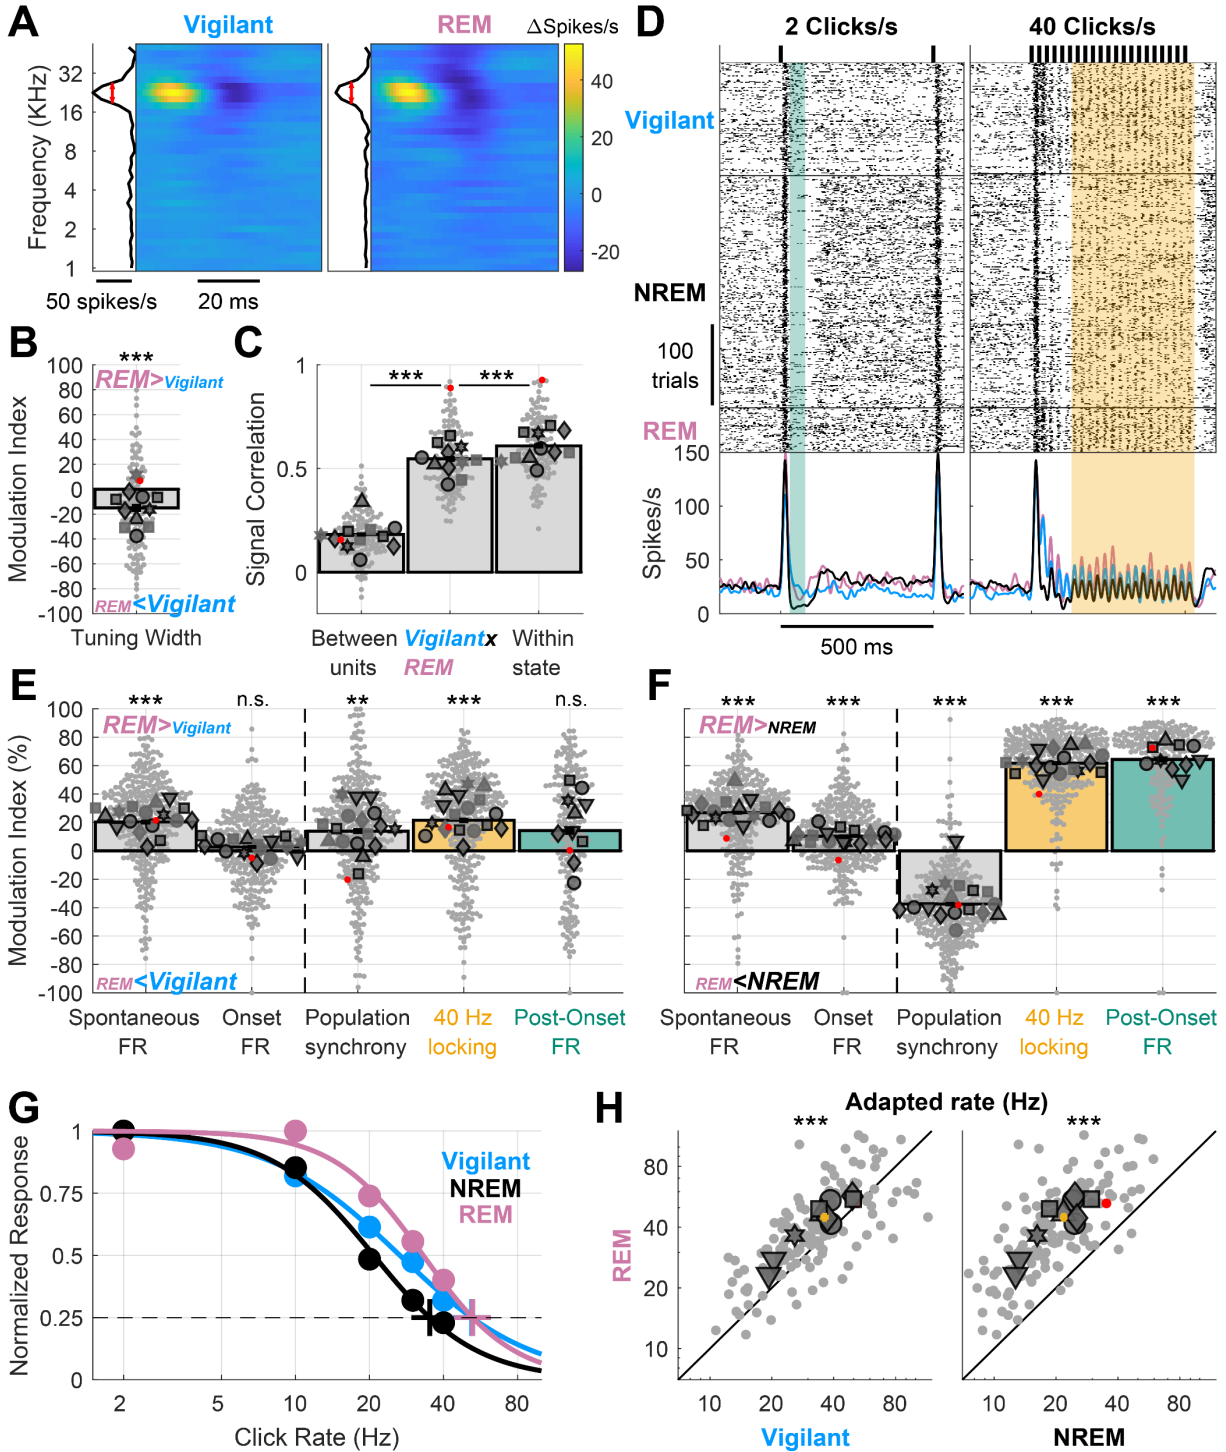

458

459 **Figure 6. Auditory processing in REM sleep resembles wakefulness rather than NREM sleep.** A) Representative  
 460 spectro-temporal receptive field (STRF) of an auditory cortex unit showing preserved tuning during the Vigilant and  
 461 REM sleep conditions (left and right, respectively). B) Modulation of frequency tuning width (REM sleep vs. Vigilant  
 462 conditions) for all units (n=122) and sessions (n=11). C) Signal correlations of frequency tuning across the entire  
 463 dataset between different units in the same session (left bar), between Vigilant and REM-sleep conditions of the

464 same individual units (middle bar) and between 1st and 2nd halves of trials in the same condition for the same  
465 individual units (right bar). Note that signal correlations are nearly as high across Vigilant and REM-sleep conditions  
466 as they are within the same condition. D) An example unit raster and peristimulus time histogram (PSTH) for 2 and  
467 40 clicks/s click trains (left and right, respectively). Green shading represents the post-onset [30,80]ms period and  
468 yellow shading represents the [130,530]ms period with sustained locking to the 40 click/s train. Note that in both  
469 these intervals, neuronal activity was similar in Vigilant and REM sleep, unlike the attenuation observed in NREM  
470 sleep. E) Modulation of spontaneous FR, onset response FR, population synchrony, 40-Hz locking and post onset FR  
471 during REM sleep relative to the Vigilant condition for all units (n=327/198) and sessions (n=17/10). 2 click/s train  
472 were only presented in 11 sessions ('auditory paradigm A'). Most auditory processing features were comparable or  
473 enhanced in REM sleep compared with the Vigilant condition. Dashed vertical line separates features minimally/not  
474 significantly affected by NREM sleep/Tired as in previous figures, for reference. F) same as E but comparing REM  
475 sleep to NREM sleep. G) Normalized locked responses in a representative unit (y-axis) as a function of click rate (x-  
476 axis) separately for Vigilant (cyan), NREM sleep (green), and REM sleep (pink). Circles represent the observed locked  
477 response to each click rate in each condition. Thick traces represent the best sigmoid fit. Cross represents the  
478 estimated 'adapted click-rate', i.e. the click rate for which the normalized response would be 25% of maximum. H)  
479 Left: scatter plot of the 'adapted click-rate' for all units (n=138) and sessions (n=10), comparing REM sleep (y-axis)  
480 with Vigilant conditions (x-axis); Right: same when comparing REM sleep (y-axis) with recovery NREM sleep (x-axis).  
481 Yellow cross represents mean±SEM across all units. For Panels B, C, E, F and H: small gray markers represent  
482 individual units. Large dark gray markers represent mean of all units in an individual session. Each marker shape  
483 represents sessions from an individual animal. Markers with/without black edges represent 'auditory paradigm A'  
484 and 'auditory paradigm B' sessions, respectively. Red dots point to the representative unit presented in panels A and  
485 D.

486 LME). Conversely, robust differences in the adapted rate emerged when comparing REM sleep (38.8  
487 clicks/s) to NREM sleep (19.5 clicks/s; Fig. 6H right,  $p=7.1 \times 10^{-46}$ ,  $t_{135}=21.7$ , LME). Altogether, cortical  
488 auditory processing during REM sleep is dramatically different from that in NREM sleep, showing a profile  
489 similar to that observed during the Vigilant condition (and in some aspects exhibiting even stronger  
490 activity).

491

## 492 Discussion

493

494 The present results reveal how SD affects activity and stimulus-evoked responses in the auditory cortex.  
495 We find that some aspects of cortical auditory processing – including frequency tuning, spontaneous  
496 firing, and onset responses – are preserved across Vigilant and Tired conditions and are largely invariant  
497 to SD. By contrast, population synchrony, entrainment to fast click-trains, and post-onset silence are  
498 strongly modulated by SD (Fig. 2). The effects of SD on cortical auditory processing mimic those of NREM  
499 sleep, when similar effects manifest with stronger intensity (Fig. 3). Both SD and NREM sleep entail  
500 sensory adaptation at lower frequencies, suggesting that low-arousal states disrupt cortical processing of  
501 fast inputs (Fig. 4). We also find that stimulus-induced neuronal silent intervals are more sensitive to SD  
502 than are spontaneous silent intervals ('OFF-states', Fig. 5), a result that could be interpreted to show  
503 that perturbation reveals a hidden state of neuronal bi-stability not easily observed in spontaneous  
504 activity (Massimini et al., 2005; Vyazovskiy et al., 2009b). Finally, auditory processing during REM sleep  
505 (Fig. 6) resembles that in vigilant wakefulness (unlike NREM sleep) and highlights the key role of cortical  
506 desynchronization in auditory processing. Our results extend previous research showing that SD and  
507 drowsiness influences sensory processing (Kong et al., 2014; Muller-Gass and Campbell, 2019; Nir et al.,  
508 2017; Weissman et al., 2006; Wiggins et al., 2018) by showing that SD-induced changes already occur at  
509 primary cortices, earlier along the ascending cortical hierarchy than reported so far.

510 How do the present results stand with respect to whether primary cortices are robustly modulated, or  
511 largely invariant, to brain states and arousal? On one hand, the effects of states such as sleep and  
512 anesthesia are typically more modest in primary cortex than in high-order regions (Davis et al., 2007;  
513 Hayat et al., 2021; Krom et al., 2020; Liu et al., 2012; Makov et al., 2017; Nourski et al., 2018, 2016; Sela  
514 et al., 2020; Sellers et al., 2015; Sharon and Nir, 2018). Similarly, the effects of neuromodulation,  
515 attention, and consciousness are more prevalent in high-order regions compared to early sensory cortex  
516 (Atiani et al., 2014; Gelbard-Sagiv et al., 2018; Leopold and Logothetis, 1996). On the other hand, many  
517 studies report robust changes in early sensory cortex processing associated with arousal, task  
518 engagement, and other task parameters (Bagur et al., 2018; Banks et al., 2018; Carcea et al., 2017; Downer  
519 et al., 2015; Lin et al., 2019; Marguet and Harris, 2011; McGinley et al., 2015; Niwa et al., 2012; Otazu et  
520 al., 2009; Pachitariu et al., 2015; Sakata, 2016; Schwartz et al., 2020; Shimaoka et al., 2018; Zhou et al.,  
521 2014). Our results support a model in which specific features of the auditory response undergo increasing

522 state-dependent deterioration along the sensory hierarchy. At the earliest processing stages - in  
523 peripheral sensory organs, thalamus, and primary cortices - response degradation gradually accumulates  
524 but on the whole is often modest and difficult to detect (Bereshpolova et al., 2011; Sakata, 2016;  
525 Scholvinck et al., 2015). Degradation builds up further along the cortical hierarchy, possibly due to higher  
526 sensitivity of inter-cortical signal transmission to behavioral states. Thus, in high-order regions, responses  
527 most correlated with perception often exhibit a sharper contrast between states. By focusing on  
528 responses in sensory cortex during SD, we were able to reveal state-dependent changes in specific  
529 features of neuronal response already at early auditory cortex.

530 Directly comparing different features ('motifs') of AC processing reveals which neural signatures are most  
531 sensitive to low-arousal. We find that SD and sleep only weakly affect neuronal tuning, spontaneous firing,  
532 and onset responses, compared with other aspects of auditory processing. The observation that frequency  
533 tuning is relatively invariant to SD and sleep is in line with the fact that it was traditionally studied  
534 successfully in anesthetized animals (Merzenich et al., 1975). However, while some studies report  
535 invariant tuning across states (Schwartz et al., 2020; Zhou et al., 2014), others report arousal-induced  
536 modulations in tuning (Gaese et al., 2001; Lin et al., 2019). Naturally, differences between separate studies  
537 can reflect changes in magnitude/type of arousal manipulation (e.g. sleep vs. anesthesia), species, cortical  
538 layer, or recorded cell types. The strength of the current study is that by comparing different motifs of  
539 auditory processing in the same neurons and experiments, our results provide important context in  
540 showing that frequency tuning is one of the most arousal-invariant feature of AC processing compared  
541 with other features we measured. We also find that SD and sleep only modestly affect baseline firing rates  
542 and onset response magnitudes in AC, in general agreement with previous reports showing modest  
543 changes during sleep (Issa and Wang, 2008; Nir et al., 2013a; Sela et al., 2020). While previous rodent  
544 studies reported increased spiking activity upon prolonged wakefulness and sleep deprivation (Fisher et  
545 al., 2016; Vyazovskiy et al., 2009a), we do not observe such increases, possibly due to our focus on early  
546 sensory cortex or due to differences in the sleep-deprivation method (Fisher et al., 2016).

547 By contrast to invariant features, population synchrony robustly increases upon SD (and even more so in  
548 NREM sleep), likely reducing the capacity of cortical circuits to represent information and support  
549 perception, consciousness, and behavior (Averbeck et al., 2006; Downer et al., 2015). Indeed, increased  
550 synchrony in neuronal populations at low frequencies (<20Hz) represents a core feature of low arousal  
551 states such as SD & sleep, spanning multiple levels from individual neurons, through circuits, to non-

552 invasive global EEG recordings (Finelli et al., 2000; Nir et al., 2013b; Steriade et al., 1993; Vyazovskiy and  
553 Tobler, 2005; Vyazovskiy et al., 2011).

554 Our results extend previous work showing that reduced entrainment to fast inputs is a hallmark of  
555 unconscious low-arousal states. During deep anesthesia, responses to high-frequency stimuli are  
556 attenuated in cat visual cortex (Rager, 1998) and in rodent somatosensory (Castro-Alamancos, 2004) and  
557 auditory cortex (Marguet and Harris, 2011). In natural sleep and light propofol anesthesia, auditory cortex  
558 of both rodents and humans reveals reduced responses to 40Hz click-trains (Bergman et al., 2022; Hayat  
559 et al., 2021; Krom et al., 2020), as has been originally observed with scalp EEG (Lustenberger et al., 2017;  
560 Plourde, 1990). Here, we extend these results to show that already during wakefulness, SD-induced Tired  
561 conditions entail sensory adaptation at significantly lower frequencies, acting like a low-pass filter that  
562 quenches high-frequency neural inputs and diminishes rapid transmission of information across brain  
563 regions. The underlying mechanism may involve changes in short term synaptic plasticity, as the synaptic  
564 proteome was recently shown to be modulated by SD (Noya et al., 2019).

565 The most sensitive feature of auditory processing modulated by SD and NREM sleep is stimulus-induced  
566 neuronal silence, which has been suggested to reveal an underlying neuronal bi-stability in low-arousal  
567 states (Massimini et al., 2007). Such bi-stability may not allow neurons in low-arousal states to maintain  
568 sustained firing in response to a stimulus, and its occurrence in some cortical regions may underlie the  
569 behavioral inability to successfully maintain sustained attention (Vyazovskiy et al., 2011). While we cannot  
570 definitively demonstrate that stimulus-induced silent intervals reflect genuine membrane potential bi-  
571 stability (Up and Down states), we believe our results agree with that interpretation. For one, the fact that  
572 silent intervals don't appear after vigorous spontaneous spiking (Fig. 5A-C), strengthens the notion that  
573 stimulus-induced silent intervals indeed reflect a network level phenomenon, not just individual neurons  
574 showing suppressed FR after vigorous spiking. Importantly, stimulus-induced activity reveals a hidden  
575 facet of neuronal activity during SD (propensity for silent intervals) that is not readily observed in  
576 spontaneous activity (Vyazovskiy et al., 2013). Our results join previous work with transcranial magnetic  
577 stimulation (TMS) in humans (Massimini et al., 2007), as well as electrical intracortical stimulation in  
578 rodents (Vyazovskiy et al., 2013, 2009b), both showing that perturbation can reveal the latent state of  
579 cortical activity and trigger a slow wave at any time during NREM sleep, even when the ongoing EEG shows  
580 little spontaneous slow wave activity. Indeed, quantifying the brain's response to perturbation (e.g. with  
581 TMS-EEG) offers a more sensitive approach to detect bi-stability that accompanies disorders of



582 consciousness and brain-injured patients (Casali et al., 2013). Our results suggest that examining the  
583 response to sensory stimuli might be a particularly effective way to assess the level of drowsiness and  
584 sleep deprivation (for example in the context of human EEG during driving).

585 Our results extend the notion that NREM-sleep-related activities invade the activity of the waking brain  
586 after SD. This has been established for spontaneous EEG activity ('EEG slowing') (Finelli et al., 2000; Nir et  
587 al., 2017; Vyazovskiy and Tobler, 2005) and for ongoing neuronal activity and OFF states (Vyazovskiy et  
588 al., 2011). Here we show that SD mimics NREM sleep also in how it affects sensory processing, and  
589 specifically in early sensory cortex.

590 In contrast to NREM sleep, REM sleep resembles vigilant wakefulness for all features of cortical auditory  
591 activity and stimulus-evoked responses. REM sleep serves as a unique test-case to determine which  
592 elements of neuronal activity and sensory responses reflect disconnection from environmental sensory  
593 stimuli vs. elements that reflect the ability of the brain to generate conscious experience (whether  
594 externally- or internally-generated). On one hand, REM sleep is similar to NREM sleep in that both entail  
595 disconnection from the external world; on the other hand, REM sleep is similar to vigilant wakefulness in  
596 that during both states the brain generates conscious experience. Thus, the result that AC activity in REM  
597 sleep resembles vigilant wakefulness suggests that the changes in cortical auditory processing observed  
598 in SD and NREM sleep may reflect features of an unconscious brain state, and that sensory disconnection  
599 can co-occur with desynchronized wake-like processing in AC. These results point to a key role for  
600 cholinergic modulation in AC processing, given that high acetylcholine levels drive cortical  
601 desynchronization similarly across REM sleep and wakefulness (Nir and Tononi, 2010). Future studies  
602 could directly study whether cholinergic modulation of auditory pathways is necessary and sufficient to  
603 support specific features of auditory processing as observed in vigilant wakefulness.

604 Some limitations of the study should be explicitly acknowledged. First, our procedure for implanting  
605 microwire arrays did not enable us to obtain reliable information about the cortical layer and type of  
606 recorded neurons. Thus, our sample could be biased and best capture specific subpopulations such as  
607 large pyramidal cells with higher baseline firing rates that register more readily in extracellular recordings.  
608 Second, the state-dependent changes observed in early auditory cortex could possibly be inherited from  
609 earlier regions such as the auditory thalamus, not recorded here. Third, our data from NREM and REM  
610 sleep reflects recovery sleep, likely associated with deeper sleep and stronger attenuation than usual.

611 Still, the fact that robust changes in auditory processing were observed during SD while the animal was  
612 awake, and no such changes were observed during REM sleep, partly alleviates that concern. Fourth, as  
613 no behavioral task was included in the study it remains to be seen if the reported changes in auditory  
614 processing are associated with the deterioration in behavioral performance ('lapses') typical of SD. Future  
615 studies could examine if moment-to-moment variability in behavioral performance is associated with  
616 moment-to-moment changes in sensory processing. Finally, another important aspect to address is the  
617 possibility that SD periods were significantly contaminated by brief sleep episodes, which in turn may have  
618 driven the changes in auditory processing seen in the Tired condition. We don't believe this is the case,  
619 since video monitoring did not reveal periods of sleep during SD. In addition, EEG slow wave power during  
620 the Tired condition was largely comparable to the Vigilant condition, but very different from that during  
621 NREM sleep.

622 In conclusion, we examined the effects of SD and recovery sleep on different aspects of auditory cortex  
623 processing and found that SD already affects neural processing in early sensory cortex. We find that SD  
624 robustly modulated some aspects of auditory processing (population synchrony, entrainment to fast  
625 inputs, and stimulus-induced silent intervals) while other aspects remained stable (neuronal tuning,  
626 spontaneous firing and onset responses). Stimulus-induced activity reveals a hidden aspect of neuronal  
627 bi-stability that is not observed in spontaneous activity. This is important both conceptually and for  
628 practical/clinical applications, as it offers new ways to monitor sleepiness with greater sensitivity. Finally,  
629 changes in auditory processing during SD are qualitatively similar to those observed during NREM sleep  
630 but not REM sleep, suggesting that NREM-sleep-like processes are specifically invading activity of the  
631 waking brain in SD and disrupt behavior.

632

## 633 **Methods**

### 634 ***Animals***

635 Experiments were performed in seven male Wistar rats individually housed in transparent Perspex cages  
636 with food and water available ad libitum. Ambient temperature was kept between 20°-24° Celsius and a  
637 12:12 hours light/dark cycle was maintained with light onset at 10:00 AM. All experimental procedures,  
638 including animal handling, sleep deprivation and surgery, followed the National Institutes of Health's  
639 Guide for the care and use of laboratory animals and were approved by the Institutional Animal Care and  
640 Use Committee of Tel Aviv University.

### 641 ***Surgery and electrode implantation***

642 Prior to surgery, microwire arrays were coated with a thin layer of Dil fluorescent dye (DilC18, Invitrogen)  
643 under microscopic control to facilitate subsequent localization. Surgery was performed as previously  
644 described (Sela et al., 2020). First, induction of general anesthesia was achieved using isoflurane (4%).  
645 Animals were then placed in a stereotactic frame (David Kopf Instruments) and maintained for the rest of  
646 the surgery under anesthesia (isoflurane, 1.5-2%) and 37°C body temperature (closed-loop heating pad  
647 system, Harvard Apparatus). Animals were administered antibiotics (Cefazolin, 20 mg/kg i.m.), analgesia  
648 (Carpofen, 5 mg/kg i.p.) and dexamethasone (0.5 mg/kg, i.p.). Their scalp was shaved and liquid gel  
649 (Viscotears) was applied to protect the eyes. lignocaine (7 mg/kg) was infused subcutaneously before  
650 incision and then the skull was exposed and cleaned. Two frontal screws (one on each hemisphere, 1mm  
651 in diameter) and a single parietal screw (left hemisphere) were placed in the skull for recording EEG. Two  
652 screws, serving as reference and ground, were placed above the cerebellum. Two single-stranded  
653 stainless-steel wires were inserted to the neck muscles to record EMG. EEG and EMG wires were soldered  
654 onto a head-stage connector (Omnetics). Dental cement was used to cover all screws and wires. A small  
655 craniotomy was performed over the right hemisphere, and the dura was carefully dissected. A 16-  
656 electrode microwire array targeting the auditory cortex was implanted (Tucker-Davis Technologies, TDT,  
657 33 or 50µm wire diameter, 6-6.5 mm long, 15° tip angle; arrays consisting of 2 rows × 8 wires, with 375µm  
658 medial-lateral separation between rows and 250µm anterior–posterior separation within each row).  
659 Implantation was diagonal (angle of 28°, see Fig. 1B) using insertion point center coordinates of P: -  
660 4.30mm, L: 4.5mm relative to Bregma, and inserted to a final depth of 4.6mm. Following implantation, a  
661 silicone gel was applied to cover the craniotomy (Kwik-Sil; World Precision Instruments) and Fusio  
662 (Pentron) was used to fix the microwire array in place. At the end of the surgery, chloramphenicol 3%

663 ointment was applied topically and additional analgesia was provided by injecting buprenorphine  
664 systemically (0.025 mg/kg s.c.) as the rat awoke from anesthesia. Dexamethasone (1.3 mg/kg) was given  
665 with food in the days following the surgery to reduce pain and inflammation around implantation.

### 666 ***Histology***

667 Upon completion of the experiments, position of electrodes was verified by histology in 4 out of 7 animals  
668 (e.g. Fig. 1B). Animals were transcardially perfused with 4% paraformaldehyde (PFA) under deep (5%  
669 isoflurane) anesthesia. Brains were refrigerated in PFA for a week, cut into 50–60 $\mu$ m serial coronal  
670 sections using a vibrating microtome (Leica Biosystems), and stained with fluorescent cresyl violet/Nissl  
671 (Rhenium). Histological verification confirmed that electrodes were located within areas Au1/AuD as  
672 defined by (Paxinos and Watson, 2006).

### 673 ***Electrophysiology***

674 As previously described in (Sela et al., 2020), data was acquired using a RZ2 processor (TDT) with microwire  
675 extracellular activity digitally sampled at 24.4 kHz (PZ2 amplifier, TDT) and EEG and EMG pre-amplified  
676 (RA16LI, TDT) and digitally sampled at 256.9 Hz (PZ2 amplifier, TDT). Spike sorting was performed using  
677 “wave\_clus” (Quiroga et al., 2004), employing a detection threshold of 5 SD and automatic  
678 superparamagnetic clustering of wavelet coefficients. Clusters were manually selected, refined, and  
679 tagged as multi- or single-unit based on stability throughout recording, quality of separation from other  
680 clusters, consistency of spike waveforms and inter-spike interval distributions as in (Nir et al., 2013a).

### 681 ***Experimental Design***

682 In the week preceding the surgery, subjects were habituated to spending time inside the motorized  
683 running wheel for a few hours every day (Fig 1A), and then gradually to participating in the sleep  
684 deprivation protocol (Fig. 1D, see below).

685 We ran 19 sleep deprivation experimental sessions, as follows. At light onset (10 AM) rats were moved  
686 from their home cage to a motorized running wheel (Fig 1A, Model 80860B, Lafayette Instrument) placed  
687 inside a sound-attenuation chamber (-55dB, H.N.A) and underwent 5 hours of sleep deprivation.  
688 Throughout the sleep deprivation period, the wheel was intermittently slightly rotated for 3 seconds,  
689 forcing a short running bout, with a randomly chosen 12-18 seconds interval break in between running  
690 bouts. Next, rats were left undisturbed in the fixed wheel for a recovery sleep opportunity period of 5

691 hours. Auditory stimulation (below) was delivered intermittently throughout each session, during both  
692 sleep deprivation and recovery sleep periods, without regard to the wheel's movement regime.

### 693 ***Auditory stimulation***

694 Sounds were synthesized in Matlab (MathWorks) and transduced into voltage signals by a high-sampling  
695 rate sound card (192 kHz, LynxTWO, Lynx), amplified (SA1, TDT) and played free-field through a magnetic  
696 speaker (MF1, TDT), mounted 60 cm above the motorized running wheel. We employed two different  
697 auditory paradigms on separate sessions/days:

698 *Auditory paradigm A.* (11 Sessions, 7 animals, markers with black edges accompanying histograms in  
699 figures e.g. Fig. 2B): Stimuli included click trains and a set of Dynamic Random Chords (DRCs, (Linden,  
700 2003)). Click trains were 500ms in duration at rates of either {2, 10, 20, 30, 40} clicks/sec. DRCs were 2.5s  
701 in duration and included a train of randomly chosen 20ms "chords", each comprised of an average of 6  
702 randomly chosen tone-pips at different frequencies (1-64 KHz, with 1/6 octave intervals, 5ms cosine ramp,  
703 fixed sound level). There were 190 different DRC stimuli. A typical 10h session contained 2000 blocks,  
704 each consisting of a single DRC stimulus and a single repetition of each click train (presented at random  
705 order), and with an inter-stimulus interval of 2s and  $\pm 0.25$ s jitter.

706 *Auditory paradigm B.* (8 Sessions, 6 animals, markers without black edges accompanying histograms in  
707 figures e.g. Fig. 2B): Stimuli included a 40 clicks/s click-train, and a different set of DRC stimuli with denser  
708 sampling of the frequency and intensity axes (better resolution) to allow for quantitative assessment of  
709 neuronal tuning curves. We used 6s trains of randomly chosen 20ms "chords", each comprised of an  
710 average of 12 randomly chosen tone pips at different frequencies and different sound levels (1-64 KHz,  
711 with 1/10 octave intervals, 5ms cosine ramp, spanning an 80 dB range in 10 dB intervals). There were 120  
712 different DRC stimuli. A typical 10h session contained 600 blocks, each consisting of a single DRC and 4  
713 repetitions of the 40 Hz click train, presented at random order, with an inter-stimulus interval of 2s and  
714  $\pm 0.25$ s jitter.

715 Both paradigms included an 8s inter-stimulus interval every 2 minutes.

### 716 ***Sleep scoring and analysis of arousal states***

717 Manual sleep scoring was performed offline for the entire experimental session, employing visual  
718 inspection of EEGs, EMGs and video/behavior as in previous studies (Nir et al., 2013a; Rodriguez et al.,  
719 2016; Sela et al., 2020; Vyazovskiy et al., 2011). First, we excluded any periods when the wheel was moving

720 (forced running bouts during sleep deprivation) and other periods of active wakefulness with behavioral  
721 activity (e.g., locomotion, grooming) as confirmed with video. Next, we categorized periods to either  
722 wakefulness (low-voltage high-frequency EEG activity and high tonic EMG with occasional phasic activity),  
723 NREM sleep (high-amplitude slow wave activity and low tonic EMG activity), REM sleep (low-amplitude  
724 wake-like frontal EEG co-occurring with theta activity in parietal EEG and flat EMG), or unknown periods  
725 not analyzed further (e.g. state transitions, to conservatively remove these epochs for subsequent  
726 analysis).

727 Next, each auditory stimulation trial was categorized to one of four conditions: Vigilant, Tired, NREM and  
728 REM, as follows. Vigilant and Tired categories comprised of the first or last third of (quiet) wakefulness  
729 trials during the sleep deprivation period, respectively, while NREM and REM comprised of trials scored  
730 as such during the recovery sleep period. To assert that differences between the Vigilant and NREM sleep  
731 categories did not stem from temporal order effects (e.g. Vigilant trials always preceding NREM by a few  
732 hours), we also defined a fifth condition – quiet wakefulness during the recovery sleep period, denoted  
733 as QW-RSP. Neural activity during QW-RSP was very similar to the Vigilant condition earlier in the  
734 experiment, qualitatively replicating the results of differences between Vigilant and NREM conditions  
735 (data not shown).

### 736 ***Analysis of auditory responses across states***

737 ***Neuronal Tuning analysis*** (Fig. 2A-C, 3A-C, 6A-C). To analyze responses to the two sets of DRC stimuli  
738 (Paradigms A and B) we performed the following analysis. Given that tone pips at each frequency were  
739 presented independently (statistically), we calculated the effects of each tone-pip on neuronal firing rates  
740 as:  $\Delta FR_{freq=x, soundLevel=y} = \overline{FR}_{freq=x, soundLevel=y} - \overline{FR}_{freq \neq x}$ . Tuning width (Fig. 2B, 3B, 6B) was  
741 calculated as the Full-Width Half Maximum (FWHM) around the best frequency in octaves (red lines in  
742 Fig. 2A, 3A, 6A). In paradigm B, frequency tuning width was calculated for the loudest sound level. The  
743 tuning width Modulation Index (MI) between any two conditions was defined as (and similar to Gain Index

744 in (Sela et al., 2020)):  $MI_{condA,condB} = \frac{Width_{condA} - Width_{condB}}{\max(Width_{condA}, Width_{condB})} * 100$

745 Due to a technical problem in the presentation of tones at the highest frequency of 59.7kHz, many units  
746 exhibited maximal responses to this particular frequency, so these trials were removed from subsequent  
747 analysis to ensure result validity. To calculate the signal correlation of the neuronal tuning between any  
748 two conditions we conducted the following analysis (Fig. 2C, 3C, 6C): in paradigm A, where there was only  
749 a single sound level, the neuronal tuning map was defined as the spectro-temporal receptive field (STRF,

750 see spectrograms in Fig 2A, 3A, 6A) a  $F \times T$  matrix (where  $F$  is number of frequencies- [1,64] KHz with 1/6  
751 octave steps, and  $T$  is the number of time points [0,50]ms) with each value representing the  $\Delta FR$  (above  
752 baseline) for a given frequency and time-point. The STRF map was smoothed in the temporal domain with  
753 a Gaussian kernel ( $\sigma=5$ ms). In paradigm B the tuning map was defined as the frequency response area  
754 (FRA) a  $F \times L$  matrix (where  $F$  is number of frequencies- [1,64] KHz with 0.1 octave steps, and  $L$  is the number  
755 of sound levels [0,80] dB in 10dB steps), with each value representing the  $\Delta FR$  (above baseline) for a given  
756 frequency and sound-level (in the [5,30]ms temporal window). The FRA map was smoothed in the  
757 frequency domain with a square window (length=0.3 octaves). The signal correlation between any two  
758 conditions is defined a point-by-point Pearson correlation between the two conditions tuning maps (STRF  
759 for paradigm A, and FRA for paradigm B). Realistically however, this correlation will always be smaller than  
760 one, since the neural response inevitably contains some noise, and because estimates of the response are  
761 limited by a finite number of trials. The signal correlation is also expected to be on average larger than  
762 zero, as even different units in the same region might show similar preference to frequency and temporal  
763 profile, yielding positive signal correlation. Therefore, to create meaningful benchmarks to compare signal  
764 correlations, we compared the following three values for each unit separately: (i) [minimal correlation  
765 expected]: signal correlation of each neuron's tuning map (STRF/FRA for paradigms A/B, respectively) with  
766 the tuning maps of *other units* in the session across different conditions (left bar in Fig. 2C, 3C, 6C), (ii)  
767 [main value of interest]: signal correlation of each neuron's tuning map in one condition (e.g. Vigilant)  
768 with its tuning map in the other condition (e.g. Tired, middle bar in Fig. 2C, 3C, 6C), (iii) [maximal possible  
769 correlation]: each neuron's signal correlation of its tuning map in the 1<sup>st</sup> vs. 2<sup>nd</sup> half of trials in the same  
770 condition (right bar in Fig. 2C, 3C, 6C). Formally:

771  $\{u_1, u_2, \dots, u_n\}$  a set of  $n$  Units in a given session.

772  $\{s_1, s_2\}$  a set ( $S$ ) of two Conditions we want to compare (e.g. Vigilant and Tired).

773  $\{h_1, h_2\}$  first and second half of trials for a given condition.

774  $TM_{u,s,h}$  is the Tuning-Map (STRF/FRA matrix for paradigms A/B, respectively) of Unit  $u$  for  $h$  half of trials  
775 in Condition  $s$ .

776  $\rho(TM_{u_a,s_b,h_d}, TM_{u_e,s_f,h_g})$  is the point-by-point Pearson correlation coefficient between the two tuning  
777 map matrices  $TM_{u_a,s_b,h_d}$  and  $TM_{u_e,s_f,h_g}$ .

778  $\rho(TM_{u_a, s_b}, TM_{u_e, s_f})$ , the correlation between the tuning maps of unit  $u_a$  in condition  $s_b$  and unit  $u_e$  in  
779 condition  $s_f$  is defined as mean correlation coefficient between all halves combinations:

$$780 \frac{\rho(TM_{u_a, s_b, h_1}, TM_{u_e, s_f, h_1}) + \rho(TM_{u_a, s_b, h_1}, TM_{u_e, s_f, h_2}) + \rho(TM_{u_a, s_b, h_2}, TM_{u_e, s_f, h_1}) + \rho(TM_{u_a, s_b, h_2}, TM_{u_e, s_f, h_2})}{4}$$

781 The three different measures of signal correlation (left, middle and right bars, respectively) for a given  
782 neuron  $u_i$  are defined as:

$$783 \text{SignalCorrAcrossUnits}_{u_i} = \sum_{j \in \{1, \dots, i-1, i+1, \dots, n\}} \frac{\rho(TM_{u_i, s_1}, TM_{u_j, s_2}) + \rho(TM_{u_i, s_2}, TM_{u_j, s_1})}{2(n-1)}$$

$$784 \text{SignalCorrAcrossStates}_{u_i} = \rho(TM_{u_i, s_1}, TM_{u_i, s_2})$$

$$785 \text{SignalCorrWithinState}_{u_i} = \frac{\rho(TM_{u_i, s_1, h_1}, TM_{u_i, s_1, h_2}) + \rho(TM_{u_i, s_2, h_1}, TM_{u_i, s_2, h_2})}{2}$$

786

787 **Analysis of responses to click trains** (Fig. 2D-E, 3D-E, 6D-F). Spontaneous firing rate (FR) was calculated as  
788 the mean firing rate in the [-500,0]ms window preceding the click-trains stimuli, and post-onset FR as the  
789 mean FR in the [30,80]ms window. Onset response and sustained locking to different click rates (Fig. 2D-  
790 E, 3D-E, 4A-C, 6D-H) were obtained from the smoothed peri-stimulus time histogram (PSTH, Gaussian  
791 kernel,  $\sigma=2$ ms). Onset response was obtained by extracting the maximal firing rate during the [0,50]ms  
792 window of the smoothed PSTH. Locking to different click rates (2, 10, 20, 30 & 40 clicks/s) was obtained  
793 by calculating the mean firing rate for each phase during the inter-click intervals in the [130,530]ms  
794 window. Then, firing rate locking was defined by the minimum firing rate (during the least preferred phase  
795 relative to the click) subtracted from the maximum firing rate (during the most preferred phase).  
796 Population synchrony was defined as population coupling (Okun et al., 2015), the correlation of each unit  
797 firing to that of the entire neuronal population average in 50ms bins during baseline ([-1000,0]ms).  
798 Population coupling was calculated for each trial baseline period and then averaged for all trials in a given  
799 condition.

800 Modulation index between two conditions for all measures above was calculated as for the tuning width

$$801 \text{modulation index} = \frac{\text{ConditionA} - \text{ConditionB}}{\text{Max}(\text{ConditionA}, \text{ConditionB})} \times 100$$



802 **Sensory adaptation curve fitting** (Fig. 4D-F, 6I-J). We first normalized each unit's sustained locking  
803 response to each click rate by dividing its firing rate to the maximum of all locked responses across all  
804 rates (2,10,20,30,40 clicks/s) and its onset response during the same condition (points in figure 4D and  
805 6I). we then fitted the data (the five normalized responses: 2,10,20,30,40 clicks/s) with the following  
806 sigmoid model, where  $x_0$  is the click-rate where the normalized response is 0.5 (50% of max) and  $k$  is the  
807 slope of decay of the response.

$$808 \quad \text{NormalizedResponse}_{\text{click-rate}=x \text{ clicks/s}} = \frac{1}{1 + e^{k(\log(x) - \log(x_0))}}$$

809 Using this fitted model (traces in Fig. 4D, 6I) we estimate for each neuron in each condition the 'adapted  
810 rate', defined as the estimated click rate for which the normalized response would be 0.25 (25% of the  
811 maximum, crosses in Fig. 4D, 6I; calculation with other percentile cutoff of maximum did not affect the  
812 results). In examining how the adapted rate changes across different conditions for the entire neuronal  
813 population (Fig 4E, 6I) and in an effort to exclude noisy responses, we included in the population analysis  
814 only units with satisfactory sigmoid fit ( $\text{rms} < 0.07$ ) and for which the adapted click rate was within the  
815 range of [2,150] clicks/s. This criterion led to the exclusion of a minority of neurons (47/197 units, 23.9%).

816 **Silent intervals analysis** (Fig. 5). To consider the effects of sleep deprivation and NREM sleep on  
817 spontaneous and stimulus-induced silent intervals we performed the following analysis. We created a  
818 raster plot of spontaneous spiking bursts for each unit (Fig. 5A left), which was trial-by-trial matched to  
819 the its click-induced onset response (Fig. 5A right). This was done by matching each trial of 2-Hz click-  
820 train onset response ([0,30]ms) with an identical (or as similar as possible) spike train obtained during  
821 spontaneous activity in the same arousal condition. Each unit PSTH was normalized to its baseline FR and  
822 a grand-mean PSTH was calculated for stimulus-induced responses and matched spontaneous bursts (Fig.  
823 5B). We quantified the effect per unit by calculating the mean baseline-normalized FR in the post-onset  
824 temporal window ([30,80]ms) for each condition (Vigilant, Tired and NREM sleep) and for stimulus-  
825 induced and spontaneous spiking bursts.

826 To detect (possibly local) silent intervals we performed our analysis on a per-microwire basis (aggregating  
827 the spikes from all clusters recorded in the microwire). We defined silent intervals as periods of 50ms  
828 neuron silence (Vyazovskiy et al., 2009a) and checked their probability in the baseline ([-50,0]ms), as well  
829 as post-onset ([30,80]ms) period (spontaneous and stimulus-induced silent intervals in Fig. 5, respectively,  
830 orange and green lines). To control for changes in silent interval probability stemming simply from  
831 changes in the spontaneous firing rate, we took the absolute silent interval probability and subtracted the

832 expected silent interval probability from a simulated Poisson-process unit activity with the same firing  
833 rate ( $\Delta 50\text{ms}$  silence probability in Fig. 5E). To formally compare the effects of sleep deprivation on  
834 spontaneous vs. stimulus-induced silent interval probabilities (Fig 5C) we calculated the following  
835 modulation index:

$$\begin{aligned} 836 \quad & \text{ModulationIndex}_{Tired,Vigilant} \\ 837 \quad & = \frac{\Delta Prob_{Tired} - \Delta Prob_{Vigilant}}{\max(\Delta Prob_{Vigilant}, \Delta Prob_{Tired}, \Delta Prob_{NREM}) - \min(\Delta Prob_{Vigilant}, \Delta Prob_{Tired}, \Delta Prob_{NREM})} \end{aligned}$$

838

### 839 **Statistics**

840 Due to the nested and hierarchical nature of electrophysiological neural data (Aarts et al., 2014; Makin  
841 and Orban de Xivry, 2019) we used a linear mixed-effects model (LME). The LME was used to account for  
842 non-independencies in measures from different units that were obtained in the same electrode,  
843 experimental session or animal. Animal identity was used as a random effect, together with experimental  
844 session and microwire electrode as nested random effects within each animal. Model parameters were  
845 calculated using ‘fitlme’ function (Matlab, MathWorks) using restricted maximum likelihood estimation.  
846 In the cases where the data samples were obtained on a per-microwire basis (analysis in Fig. 5D-F, instead  
847 of per-unit basis) only animal identity and experimental session (nested within animal) were used as  
848 random effects. Using conservative non-parametric statistical tests (Wilcoxon Rank-Sum Test or Wilcoxon  
849 Sign-Rank Test) on the data summarized at the level of animals (n=7) or sessions (n=19) yielded  
850 qualitatively very similar results in terms of statistical significance as the LME model (data not shown). In  
851 figures depicting mean effects per session (large markers in figures 2B, 2C, 2E, 3B, 3C, 3E, 4B, 4C, 4E, 5C,  
852 5E, 5F, 6B, 6C, 6E, 6F and 6H) only sessions with at least 5 units were included. The LME analysis however,  
853 was always applied on all sessions, even those with few units. If not stated otherwise all effect sizes  
854 mentioned in main text are described as mean $\pm$ SEM over all units. When testing for variance across  
855 multiple (>2) conditions a Friedman test was used (akin to a non-parametric repeated measures ANOVA)  
856 on data summarized at the level of animals (n=7, averaging all the units for each animal).

857

858

- 859 Aarts, E., Verhage, M., Veenvliet, J. V., Dolan, C. V., and Van Der Sluis, S. (2014). A solution to  
860 dependency: Using multilevel analysis to accommodate nested data. *Nat. Neurosci.* *17*, 491–496.
- 861 Atiani, S., Elhilali, M., David, S. V., Fritz, J.B., and Shamma, S. a. (2009). Task Difficulty and Performance  
862 Induce Diverse Adaptive Patterns in Gain and Shape of Primary Auditory Cortical Receptive Fields.  
863 *Neuron* *61*, 467–480.
- 864 Atiani, S., David, S. V., Elgueda, D., Locastro, M., Radtke-Schuller, S., Shamma, S.A., and Fritz, J.B. (2014).  
865 Emergent selectivity for task-relevant stimuli in higher-order auditory cortex. *Neuron* *82*, 486–499.
- 866 Averbeck, B.B., Latham, P.E., and Pouget, A. (2006). Neural correlations, population coding and  
867 computation. *Nat. Rev. Neurosci.* *7*, 358–366.
- 868 Bagur, S., Averseng, M., Elgueda, D., David, S., Fritz, J., Yin, P., Shamma, S., Boubenec, Y., and Ostojic, S.  
869 (2018). Go/No-Go task engagement enhances population representation of target stimuli in primary  
870 auditory cortex. *Nat. Commun.* *9*, 2529.
- 871 Banks, M.I., Moran, N.S., Krause, B.M., Grady, S.M., Uhrich, D.J., and Manning, K.A. (2018). Altered  
872 stimulus representation in rat auditory cortex is not causal for loss of consciousness under general  
873 anaesthesia. *Br. J. Anaesth.* *121*, 605–615.
- 874 Basner, M., Rao, H., Goel, N., and Dinges, D.F. (2013). Sleep deprivation and neurobehavioral dynamics.  
875 *Curr. Opin. Neurobiol.* *23*, 854–863.
- 876 Bereshpolova, Y., Stoelzel, C.R., Zhuang, J., Amitai, Y., Alonso, J.-M., and Swadlow, H.A. (2011). Getting  
877 Drowsy ? Alert / Nonalert Transitions and Visual Thalamocortical Network Dynamics. *J. Neurosci.* *31*,  
878 17480–17487.
- 879 Bergman, L., Krom, A.J., Sela, Y., Marmelshtein, A., Hayat, H., Regev, N., and Nir, Y. (2022). Propofol  
880 Anesthesia Concentration Rather Than Abrupt Behavioral Unresponsiveness Linearly Degrades  
881 Responses in the Rat Primary Auditory Cortex. *Cereb. Cortex*.
- 882 Borbély, A.A. (1982). A two process model of sleep regulation. *Hum. Neurobiol.* *1*, 195–204.
- 883 Carcea, I., Insanally, M.N., and Froemke, R.C. (2017). Dynamics of auditory cortical activity during  
884 behavioural engagement and auditory perception. *Nat. Commun.* *8*, 1–12.
- 885 Carskadon, M.A. (2004). Sleep deprivation: Health consequences and societal impact. *Med. Clin. North*  
886 *Am.* *88*, 767–776.

- 887 Casali, A.G., Gosseries, O., Rosanova, M., Boly, M., Sarasso, S., Casali, K.R., Casarotto, S., Bruno, M.-A.,  
888 Laureys, S., Tononi, G., et al. (2013). A Theoretically Based Index of Consciousness Independent of  
889 Sensory Processing and Behavior. *Sci. Transl. Med.* *5*, 198ra105-198ra105.
- 890 Castro-Alamancos, M.A. (2004). Absence of Rapid Sensory Adaptation in Neocortex during Information  
891 Processing States. *Neuron* *41*, 455–464.
- 892 Chee, M.W.L. (2015). Limitations on visual information processing in the sleep-deprived brain and their  
893 underlying mechanisms. *Curr. Opin. Behav. Sci.* *1*, 56–63.
- 894 Chee, M.W.L., Tan, J.C., Zheng, H., Parimal, S., Weissman, D.H., Zagorodnov, V., and Dinges, D.F. (2008).  
895 Lapsing during Sleep Deprivation Is Associated with Distributed Changes in Brain Activation. *J. Neurosci.*  
896 *28*, 5519–5528.
- 897 Christie, M.A., Mckenna, J.T., Connolly, N.P., Mccarley, R.W., and Strecker, R.E. (2008). 24 Hours of sleep  
898 deprivation in the rat increases sleepiness and decreases vigilance: Introduction of the rat-psychomotor  
899 vigilance task. *J. Sleep Res.* *17*, 376–384.
- 900 Davis, M.H., Coleman, M.R., Absalom, A.R., Rodd, J.M., Johnsrude, I.S., Matta, B.F., Owen, A.M., and  
901 Menon, D.K. (2007). Dissociating speech perception and comprehension at reduced levels of awareness.  
902 *Proc. Natl. Acad. Sci. U. S. A.* *104*, 16032–16037.
- 903 Doran, S.M., Van Dongen, H.P.A., and Dinges, D.F. (2001). Sustained attention performance during sleep  
904 deprivation: Evidence of state instability. *Arch. Ital. Biol.* *139*, 253–267.
- 905 Downer, J.D., Niwa, M., and Sutter, M.L. (2015). Task Engagement Selectively Modulates Neural  
906 Correlations in Primary Auditory Cortex. *J. Neurosci.* *35*, 7565–7574.
- 907 Drummond, S.P.A., Brown, G.G., Stricker, J.L., Buxton, R.B., Wong, E.C., and Gillin, J.C. (1999). Sleep  
908 deprivation-induced reduction in cortical functional response to serial subtraction. *Neuroreport* *10*,  
909 3745–3748.
- 910 Drummond, S.P.A., Bischoff-Grethe, A., Dinges, D.F., Ayalon, L., Mednick, S.C., and Meloy, M.J. (2005).  
911 The neural basis of the psychomotor vigilance task. *Sleep* *28*, 1059–1068.
- 912 Finelli, L.A., Baumann, H., Borbély, A.A., and Achermann, P. (2000). Dual electroencephalogram markers  
913 of human sleep homeostasis: Correlation between theta activity in waking and slow-wave activity in  
914 sleep. *Neuroscience* *101*, 523–529.

- 915 Fisher, S.P., Cui, N., McKillop, L.E., Gemignani, J., Bannerman, D.M., Oliver, P.L., Peirson, S.N., and  
916 Vyazovskiy, V. V. (2016). Stereotypic wheel running decreases cortical activity in mice. *Nat. Commun.* *7*,  
917 13138.
- 918 Gaese, B.H., Gaese, B.H., Ostwald, J., and Ostwald, J. (2001). Anesthesia changes frequency tuning of  
919 neurons in the rat primary auditory cortex. *J. Neurophysiol.* *86*, 1062–1066.
- 920 Gelbard-Sagiv, H., Magidov, E., Sharon, H., Hendler, T., and Nir, Y. (2018). Noradrenaline Modulates  
921 Visual Perception and Late Visually Evoked Activity. *Curr. Biol.* *28*, 2239-2249.e6.
- 922 Harris, K.D., and Thiele, A. (2011). Cortical state and attention. *Nat. Rev. Neurosci.* *12*, 509–523.
- 923 Hayat, H., Marmelshtein, A., Krom, A.J., Sela, Y., Tankus, A., Strauss, I., Fahoum, F., Fried, I., and Nir, Y.  
924 (2021). Impaired top-down auditory processing despite extensive single-neuron responses during  
925 human sleep. *BioRxiv* 2021.04.03.438283.
- 926 Issa, E.B., and Wang, X. (2008). Sensory responses during sleep in primate primary and secondary  
927 auditory cortex. *J Neurosci* *28*, 14467–14480.
- 928 Issa, E.B., and Wang, X. (2011). Altered neural responses to sounds in primate primary auditory cortex  
929 during slow-wave sleep. *J. Neurosci.* *31*, 2965–2973.
- 930 Issa, E.B., and Wang, X. (2013). Increased neural correlations in primate auditory cortex during slow-  
931 wave sleep. *J. Neurophysiol.* *109*, 2732–2738.
- 932 Jaramillo, S., and Zador, A.M. (2011). The auditory cortex mediates the perceptual effects of acoustic  
933 temporal expectation. *Nat. Neurosci.* *14*, 246–251.
- 934 Kato, H.K., Gillet, S.N., and Isaacson, J.S. (2015). Flexible Sensory Representations in Auditory Cortex  
935 Driven by Behavioral Relevance. *Neuron* *88*, 1027–1039.
- 936 Kong, D., Asplund, C.L., and Chee, M.W.L. (2014). Sleep deprivation reduces the rate of rapid picture  
937 processing. *Neuroimage* *91*, 169–176.
- 938 Krause, A.J., Simon, E. Ben, Mander, B.A., Greer, S.M., Saletin, J.M., Goldstein-Piekarski, A.N., and  
939 Walker, M.P. (2017). The sleep-deprived human brain. *Nat. Rev. Neurosci.* *18*, 404–418.
- 940 Krom, A.J., Marmelshtein, A., Gelbard-Sagiv, H., Tankus, A., Hayat, H., Hayat, D., Matot, I., Strauss, I.,  
941 Fahoum, F., Soehle, M., et al. (2020). Anesthesia-induced loss of consciousness disrupts auditory

- 942 responses beyond primary cortex. *Proc. Natl. Acad. Sci. U. S. A.* *117*.
- 943 Lee, S.H., and Dan, Y. (2012). Neuromodulation of Brain States. *Neuron* *76*, 109–222.
- 944 Leopold, D.A., and Logothetis, N.K. (1996). Activity changes in early visual cortex reflect monkeys'  
945 percepts during binocular rivalry. *Nature* *379*, 549–553.
- 946 Lim, J., and Dinges, D.F. (2010). A meta-analysis of the impact of short-term sleep deprivation on  
947 cognitive variables. *Psychol. Bull.* *136*, 375–389.
- 948 Lin, P.A., Asinof, S.K., Edwards, N.J., and Isaacson, J.S. (2019). Arousal regulates frequency tuning in  
949 primary auditory cortex. *Proc. Natl. Acad. Sci. U. S. A.* *116*, 25304–25310.
- 950 Linden, J.F. (2003). Spectrotemporal Structure of Receptive Fields in Areas AI and AAF of Mouse Auditory  
951 Cortex. *J. Neurophysiol.* *90*, 2660–2675.
- 952 Liu, X., Lauer, K.K., Ward, B.D., Rao, S.M., Li, S.J., and Hudetz, A.G. (2012). Propofol disrupts functional  
953 interactions between sensory and high-order processing of auditory verbal memory. *Hum. Brain Mapp.*  
954 *33*, 2487–2498.
- 955 Lorenzo, I., Ramos, J., Arce, C., Guevara, M.A., and Corsi-Cabrera, M. (1995). Effect of total sleep  
956 deprivation on reaction time and waking eeg activity in man. *Sleep* *18*, 346–354.
- 957 Lustenberger, C., Patel, Y.A., Alagapan, S., Page, J.M., Price, B., Boyle, M.R., and Frohlich, F. (2017). High-  
958 density EEG characterization of brain responses to auditory rhythmic stimuli during wakefulness and  
959 NREM sleep. *Neuroimage* *169*, 57–68.
- 960 Makin, T.R., and Orban de Xivry, J.-J. (2019). Ten common statistical mistakes to watch out for when  
961 writing or reviewing a manuscript. *Elife* *8*.
- 962 Makov, S., Sharon, O., Ding, N., Ben-Shachar, M., Nir, Y., and Golumbic, E.Z. (2017). Sleep disrupts high-  
963 level speech parsing despite significant basic auditory processing. *J. Neurosci.* *37*, 7772–7781.
- 964 Marguet, S.L., and Harris, K.D. (2011). State-dependent representation of amplitude-modulated noise  
965 stimuli in rat auditory cortex. *J. Neurosci.* *31*, 6414–6420.
- 966 Massimini, M., Ferrarelli, F., Huber, R., Esser, S.K., Singh, H., and Tononi, G. (2005). Breakdown of cortical  
967 effective connectivity during sleep. *Science* (80-. ). *309*, 2228–2232.
- 968 Massimini, M., Ferrarelli, F., Esser, S.K., Riedner, B.A., Huber, R., Murphy, M., Peterson, M.J., and Tononi,

- 969 G. (2007). Triggering sleep slow waves by transcranial magnetic stimulation. *Proc. Natl. Acad. Sci. U. S. A.*  
970 *104*, 8496–8501.
- 971 McGinley, M.J., David, S.V., and McCormick, D.A. (2015). Cortical Membrane Potential Signature of  
972 Optimal States for Sensory Signal Detection. *Neuron* 1–14.
- 973 Merzenich, M.M., Knight, P.L., and Roth, G.L. (1975). Representation of cochlea within primary auditory  
974 cortex in the cat. *J. Neurophysiol.* *38*, 231–249.
- 975 Muller-Gass, A., and Campbell, K. (2019). Sleep deprivation moderates neural processes associated with  
976 passive auditory capture. *Brain Cogn.* *132*, 89–97.
- 977 Nir, Y., and Tononi, G. (2010). Dreaming and the brain: from phenomenology to neurophysiology. *Trends*  
978 *Cogn. Sci.* *14*, 88–100.
- 979 Nir, Y., Vyazovskiy, V. V, Cirelli, C., Banks, M.I., and Tononi, G. (2013a). Auditory Responses and Stimulus-  
980 Specific Adaptation in Rat Auditory Cortex are Preserved Across NREM and REM Sleep. *Cereb. Cortex*  
981 bht328-.
- 982 Nir, Y., Massimini, M., and Boly, M. (2013b). *Neuroimaging of Consciousness* (Berlin, Heidelberg:  
983 Springer Berlin Heidelberg).
- 984 Nir, Y., Andrillon, T., Marmelshtein, A., Suthana, N., Cirelli, C., Tononi, G., and Fried, I. (2017). Selective  
985 neuronal lapses precede human cognitive lapses following sleep deprivation. *Nat. Med.* *23*, 1474–1480.
- 986 Niwa, M., Johnson, J.S., O’Connor, K.N., and Sutter, M.L. (2012). Active engagement improves primary  
987 auditory cortical neurons’ ability to discriminate temporal modulation. *J Neurosci* *32*, 9323–9334.
- 988 Nourski, K. V., Steinschneider, M., Rhone, A.E., Kawasaki, H., Howard, M.A., and Banks, M.I. (2018).  
989 Auditory Predictive Coding across Awareness States under Anesthesia: An Intracranial Electrophysiology  
990 Study. *J. Neurosci.* *183*, 412–424.
- 991 Nourski, K. V, Todd, M.M., Steinschneider, M., Banks, M.I., Rhone, A.E., Mueller, R.N., Kawasaki, H., and  
992 Howard, M.A. (2016). Electrocorticographic (ECoG) delineation of human auditory cortical fields based  
993 on effects of propofol anesthesia. *Soc. Neurosci.* *152*, 1515678.
- 994 Noya, S.B., Colameo, D., Brüning, F., Spinnler, A., Mircsof, D., Opitz, L., Mann, M., Tyagarajan, S.K.,  
995 Robles, M.S., and Brown, S.A. (2019). The forebrain synaptic transcriptome is organized by clocks but its  
996 proteome is driven by sleep. *Science* (80-. ). 366.

- 997 Okun, M., Steinmetz, N. a., Cossell, L., Iacaruso, M.F., Ko, H., Barthó, P., Moore, T., Hofer, S.B., Mrcic-  
998 Flogel, T.D., Carandini, M., et al. (2015). Diverse coupling of neurons to populations in sensory cortex.  
999 *Nature* 521, 511–515.
- 1000 Otazu, G.H., Tai, L.-H., Yang, Y., and Zador, A.M. (2009). Engaging in an auditory task suppresses  
1001 responses in auditory cortex. *Nat. Neurosci.* 12, 646–654.
- 1002 Pachitariu, M., Lyamzin, D.R., Sahani, M., and Lesica, N. a (2015). State-Dependent Population Coding in  
1003 Primary Auditory Cortex. 35, 2058–2073.
- 1004 Padilla, M.L., Wood, R.A., Hale, L.A., and Knight, R.T. (2006). Lapses in a prefrontal-extrastriate  
1005 preparatory attention network predict mistakes. *J. Cogn. Neurosci.* 18, 1477–1487.
- 1006 Paxinos, G., and Watson, C. (2006). *The rat brain in stereotaxic coordinates: hard cover edition*  
1007 (Elsevier).
- 1008 Plourde, G. (1990). Human Auditory Steady-State Response During General Anesthesia. 460–468.
- 1009 Plourde, G. (1996). The effects of propofol on the 40-Hz auditory steady-state response and on the  
1010 electroencephalogram in humans. *Anesth. Analg.* 82, 1015–1022.
- 1011 Portas, C.M., Rees, G., Howseman, A.M., Josephs, O., Turner, R., and Frith, C.D. (1998). A specific role for  
1012 the thalamus in mediating the interaction of attention and arousal in humans. *J. Neurosci.* 18, 8979–  
1013 8989.
- 1014 Quiroga, R.Q., Nadasdy, Z., and Ben-Shaul, Y. (2004). Unsupervised spike detection and sorting with  
1015 wavelets and superparamagnetic clustering. *Neural Comput.* 16, 1661–1687.
- 1016 Rager, G. (1998). The response of cat visual cortex to flicker stimuli of variable frequency. *Eur. J.*  
1017 *Neurosci.* 10, 1856–1877.
- 1018 Raz, A., Grady, S.M., Krause, B.M., Uhlrich, D.J., Manning, K. a, and Banks, M.I. (2014). Preferential effect  
1019 of isoflurane on top-down vs. bottom-up pathways in sensory cortex. *Front. Syst. Neurosci.* 8, 191.
- 1020 Rodriguez, X.A. V, Funk, X.C.M., Vyazovskiy, X.V. V, Nir, X.Y., Tononi, G., and Cirelli, X.C. (2016). Why  
1021 Does Sleep Slow-Wave Activity Increase After Extended Wake ? Assessing the Effects of Increased  
1022 Cortical Firing During Wake and Sleep. 36, 12436–12447.
- 1023 Sakata, S. (2016). State-dependent and cell type-specific temporal processing in auditory



- 1024 thalamocortical circuit. *Sci. Rep.* *6*, 1–13.
- 1025 Scholvinck, M.L., Saleem, A.B., Benucci, A., Harris, K.D., and Carandini, M. (2015). Cortical State  
1026 Determines Global Variability and Correlations in Visual Cortex. *J. Neurosci.* *35*, 170–178.
- 1027 Schwartz, Z.P., Buran, B.N., and David, S. V. (2020). Pupil-associated states modulate excitability but not  
1028 stimulus selectivity in primary auditory cortex. *J. Neurophysiol.* *123*, 191–208.
- 1029 Sela, Y., Krom, A.J., Bergman, L., Regev, N., and Nir, Y. (2020). Sleep differentially affects early and late  
1030 neuronal responses to sounds in auditory and perirhinal cortices. *J. Neurosci.* *40*, 2895–2905.
- 1031 Sellers, K.K., Bennett, D. V., Hutt, A., Williams, J.H., and Fröhlich, F. (2015). Awake vs. anesthetized:  
1032 layer-specific sensory processing in visual cortex and functional connectivity between cortical areas. *J.*  
1033 *Neurophysiol.* *113*, 3798–3815.
- 1034 Sharon, O., and Nir, Y. (2018). Attenuated Fast Steady-State Visual Evoked Potentials During Human  
1035 Sleep. *Cereb. Cortex* *28*, 1297–1311.
- 1036 Shimaoka, D., Harris, K.D., and Carandini, M. (2018). Effects of Arousal on Mouse Sensory Cortex Depend  
1037 on Modality. *Cell Rep.* *22*, 3160–3167.
- 1038 Steriade, M., Nunez, A., and Amzica, F. (1993). Intracellular analysis of relations between the slow  
1039 (&lt;math>\delta</math> 1 Hz) neocortical oscillation and other sleep rhythms of the electroencephalogram. *J.*  
1040 *Neurosci.* *13*, 3266 LP – 3283.
- 1041 Thomas, M.L., Sing, H.C., Belenky, G., Holcomb, H.H., Mayberg, H.S., Dannals, R.F., Wagner, H.N.,  
1042 Thorne, D.R., Popp, K.A., Rowland, L.M., et al. (2000). Neural basis of alertness and cognitive  
1043 performance impairments during sleepiness II. Effects of 48 and 72 h of sleep deprivation on waking  
1044 human regional brain activity. *J. Sleep Res.* *9*, 335–352.
- 1045 Tomasi, D., Wang, R.L., Telang, F., Boronikolas, V., Jayne, M.C., Wang, G.J., Fowler, J.S., and Volkow, N.D.  
1046 (2009). Impairment of attentional networks after 1 night of sleep deprivation. *Cereb. Cortex* *19*, 233–  
1047 240.
- 1048 Vyazovskiy, V. V., and Tobler, I. (2005). Theta activity in the waking EEG is a marker of sleep propensity  
1049 in the rat. *Brain Res.* *1050*, 64–71.
- 1050 Vyazovskiy, V. V., Olcese, U., Lazimy, Y.M., Faraguna, U., Esser, S.K., Williams, J.C., Cirelli, C., and Tononi,  
1051 G. (2009a). Cortical Firing and Sleep Homeostasis. *Neuron* *63*, 865–878.

- 1052 Vyazovskiy, V. V., Olcese, U., Cirelli, C., and Tononi, G. (2013). Prolonged wakefulness alters neuronal  
1053 responsiveness to local electrical stimulation of the neocortex in awake rats. *J. Sleep Res.* 22, 239–250.
- 1054 Vyazovskiy, V. V., Faraguna, U., Cirelli, C., and Tononi, G. (2009b). Triggering slow waves during NREM  
1055 sleep in the rat by intracortical electrical stimulation : Effects of sleep / wake history and background  
1056 activity. *J. Neurophysiol.* 101, 1921–1931.
- 1057 Vyazovskiy, V. V., Olcese, U., Hanlon, E.C., Nir, Y., Cirelli, C., and Tononi, G. (2011). Local sleep in awake  
1058 rats. *Nature* 472, 443–447.
- 1059 Weissman, D.H., Roberts, K.C., Visscher, K.M., and Woldorff, M.G. (2006). The neural bases of  
1060 momentary lapses in attention. *Nat. Neurosci.* 9, 971–978.
- 1061 Wiggins, E., Mottarella, M., Good, K., Eggleston, S., and Stevens, C. (2018). 24-h sleep deprivation  
1062 impairs early attentional modulation of neural processing: An event-related brain potential study.  
1063 *Neurosci. Lett.* 677, 32–36.
- 1064 Wu, J.C., Gillin, J.C., Buchsbaum, M.S., Chen, P., Keator, D.B., Khosla Wu, N., Darnall, L.A., Fallon, J.H.,  
1065 and Bunney, W.E. (2006). Frontal lobe metabolic decreases with sleep deprivation not totally reversed  
1066 by recovery sleep. *Neuropsychopharmacology* 31, 2783–2792.
- 1067 Zhou, M., Liang, F., Xiong, X.R., Li, L., Li, H., Xiao, Z., Tao, H.W., and Zhang, L.I. (2014). Scaling down of  
1068 balanced excitation and inhibition by active behavioral states in auditory cortex. *Nat. Neurosci.* 17, 841–  
1069 850.
- 1070 Zhuang, J., Bereshpolova, Y., Stoelzel, C.R., Huff, J.M., Hei, X., Alonso, J.M., and Swadlow, H.A. (2014).  
1071 Brain state effects on layer 4 of the awake visual cortex. *J Neurosci* 34, 3888–3900.
- 1072
